# Supplementary material
Source: PubMed Central journal article supplement (PMC5953843)
Supplement: NIHMS960858-supplement-Material.pdf [file NIHMS960858-supplement-Material.pdf]

**Title: Cardiovascular mortality of oral anti-diabetic drugs approved before and after the 2008 United States Food and Drug Administration (FDA) guidance for industry — a systemic review and meta-analysis**

**Journal: Clinical Drug Investigation**

**Authors:** Rashmi Goyat, B.Pharm, School of Pharmacy, Department of Pharmaceutical Systems and Policy, West Virginia University, Morgantown, WV, 26506, Office Phone: 304-293-1832, E-mail: [ragoyat@mix.wvu.edu](mailto:ragoyat@mix.wvu.edu)

Pragya Rai, MS, School of Pharmacy, Department of Pharmaceutical Systems and Policy, West Virginia University, Morgantown, WV, 26506, Office Phone: 304-293-1832, E-mail: [pr0001@mix.wvu.edu](mailto:pr0001@mix.wvu.edu)

Jongwha Chang, PhD, School of Pharmacy, Department of Pharmacy Practice, University of Texas, El Paso, Texas, 79968, Office phone: 915-747-8241, E-mail: [jchang@utep.edu](mailto:jchang@utep.edu)

Charles D. Ponte, PharmD, School of Pharmacy, Department of Clinical Pharmacy, West Virginia University, Morgantown, WV, 26506, Office phone: 304-293-1460, E-mail: [cdponte@hsc.wvu.edu](mailto:cdponte@hsc.wvu.edu)

Xi Tan, PhD, PharmD, School of Pharmacy, Department of Pharmaceutical Systems and Policy, West Virginia University, Morgantown, WV, 26506, office Phone: 304-293-9315, E-mail: [xntan@hsc.wvu.edu](mailto:xntan@hsc.wvu.edu)

**Corresponding author:** Xi Tan, PhD, PharmD, School of Pharmacy, Department of Pharmaceutical Systems and Policy, West Virginia University, Morgantown, WV, 26506, Office Phone: 304-293-9315,

E-mail: [xntan@hsc.wvu.edu](mailto:xntan@hsc.wvu.edu)

**eTable 1. List of excluded studies and the reasons for exclusion**

| Study # | Author                                   | Publication year | Title                                                                                                                                                                                 | Reason for exclusion                                                     |
|---------|------------------------------------------|------------------|---------------------------------------------------------------------------------------------------------------------------------------------------------------------------------------|--------------------------------------------------------------------------|
| 2       | [1]                                      | 2005             | Biventricular pacing (cardiac resynchronization therapy): an evidence-based analysis                                                                                                  | Study design is not RCT, neither intervention nor control group were OHA |
| 4       | [2]                                      | 2013             | HbA1c targets in type 2 diabetes: Guidelines and evidence                                                                                                                             | Study design is not RCT                                                  |
| 6       | [3]                                      | 2015             | Hypoglycaemic therapy in type 2 diabetes. Part I. Metformin is the only glucose-lowering drug known to prevent complications of diabetes                                              | Study design is not RCT                                                  |
| 7       | [4]                                      | 2015             | CADTH Rapid Response Reports                                                                                                                                                          | Study design is not RCT                                                  |
| 8       | [5]                                      | 2015             | Glucose-lowering treatment of type 2 diabetes: Part II - glucose-lowering drugs after metformin: A choice based largely on adverse effects                                            | Study design is not RCT                                                  |
| 11      | [6]                                      | 2016             | Empagliflozin (Jardiance). Type 2 diabetes: no rush to use this drug                                                                                                                  | Study design is not RCT                                                  |
| 13      | A. S. Abdelmoneim, et al.[7]             | 2015             | Cardiovascular safety of sulphonylureas: Over 40years of continuous controversy without an answer                                                                                     | Study design is not RCT                                                  |
| 14      | M. Abdel-Wahab, et al.[8]                | 2014             | Comparison of balloon-expandable vs self-expandable valves in patients undergoing transcatheter aortic valve replacement: the CHOICE randomized clinical trial                        | Intervention group is not OHA                                            |
| 15      | C. Abaira, et al.[9]                     | 1997             | Cardiovascular events and correlates in the Veterans Affairs Diabetes Feasibility Trial. Veterans Affairs Cooperative Study on Glycemic Control and Complications in Type II Diabetes | Intervention group is not OHA                                            |
| 16      | S. Agarwal, et al.[10]                   | 2014             | Meta-analysis of the cardiovascular outcomes with dipeptidyl peptidase 4 inhibitors: validation of the current FDA mandate                                                            | Study design is not RCT                                                  |
| 17      | S. Akdag, et al.[11]                     | 2015             | The effect of low-sodium dialysate on ambulatory blood pressure measurement parameters in patients undergoing hemodialysis                                                            | Study participants were not T2DM patients                                |
| 18      | F. Alahdab, et al.[12]                   | 2015             | A systematic review for the screening for peripheral arterial disease in asymptomatic patients                                                                                        | Study design is not RCT                                                  |
| 19      | P. W. Aline Roth and F. R. Jornayvaz[13] | 2016             | [Cardiovascular safety of antidiabetics]                                                                                                                                              | Study design is not RCT                                                  |
| 20      | S. M. Al-Khatib, et al.[14]              | 2013             | AHRQ Comparative Effectiveness Reviews                                                                                                                                                | Study design is not RCT                                                  |
| 21      | M. Al-Omran and T. F. Lindsay[15]        | 2005             | Should all patients with peripheral arterial disease be treated with an angiotensin-converting enzyme inhibitor?                                                                      | Study participants were not T2DM patients                                |
| 22      | J. Anderson, et al.[16]                  | 2013             | Does metformin improve vascular health in children with type 1 diabetes? Protocol for a one year, double blind, randomized, placebo controlled trial                                  | Study participants were not T2DM patients                                |

| <b>Study #</b> | <b>Author</b>                       | <b>Publication year</b> | <b>Title</b>                                                                                                                                                                    | <b>Reason for exclusion</b>               |
|----------------|-------------------------------------|-------------------------|---------------------------------------------------------------------------------------------------------------------------------------------------------------------------------|-------------------------------------------|
| 24             | T. Ando, et al.[17]                 | 2016                    | Transcatheter aortic valve replacement versus surgical aortic valve replacement in patients with previous coronary artery bypass surgery: A systematic review and meta-analysis | Study participants were not T2DM patients |
| 25             | T. Ando and H. Takagi[18]           | 2016                    | The Prognostic Impact of New-Onset Persistent Left Bundle Branch Block Following Transcatheter Aortic Valve Implantation: A Meta-analysis                                       | Study participants were not T2DM patients |
| 26             | R. C. Andrews and M. Z. Chen[19]    | 2014                    | Bariatric surgery for type 2 diabetes always produces a good outcome                                                                                                            | Intervention group is not OHA             |
| 27             | F. Angeli, et al.[20]               | 2010                    | ss-Blockers reduce mortality in patients undergoing high-risk non-cardiac surgery                                                                                               | Study participants were not T2DM patients |
| 28             | G. A. Antoniou, et al.[21]          | 2014                    | Statin therapy in lower limb peripheral arterial disease: Systematic review and meta-analysis                                                                                   | Study participants were not T2DM patients |
| 29             | G. A. Antoniou, et al.[22]          | 2015                    | Meta-analysis of the effects of statins on perioperative outcomes in vascular and endovascular surgery                                                                          | Study participants were not T2DM patients |
| 30             | J. Aro[23]                          | 1991                    | Cardiovascular and all-cause mortality in prostatic cancer patients treated with estrogens or orchiectomy as compared to the standard population                                | Study participants were not T2DM patients |
| 31             | J. L. Aro, et al.[24]               | 1989                    | High dose polyoestradiol phosphate with and without acetosalicylic acid versus orchiectomy in the treatment of prostatic cancer. Finnprostate Group                             | Study participants were not T2DM patients |
| 32             | D. Aronson and E. R. Edelman[25]    | 2014                    | Coronary artery disease and diabetes mellitus                                                                                                                                   | Intervention group is not OHA             |
| 33             | K. A. Arsenault, et al.[26]         | 2013                    | Interventions for preventing post-operative atrial fibrillation in patients undergoing heart surgery                                                                            | Study participants were not T2DM patients |
| 34             | B. O. Åsvold, et al.[27]            | 2000                    | Sulphonylurea and cardiovascular risk                                                                                                                                           | Study design is not RCT                   |
| 35             | E. D. Avgerinos and R. A. Chaer[28] | 2015                    | Catheter-directed interventions for acute pulmonary embolism                                                                                                                    | Study participants were not T2DM patients |
| 36             | S. Azim, et al.[29]                 | 2014                    | Evaluating Cardiovascular Safety of Novel Therapeutic Agents for the Treatment of Type 2 Diabetes Mellitus                                                                      | Study design is not RCT                   |
| 38             | K. Bajuk Studen, et al.[30]         | 2013                    | Cardiovascular risk and subclinical cardiovascular disease in polycystic ovary syndrome                                                                                         | Study participants were not T2DM patients |
| 39             | E. M. Balk, et al.[31]              | 2016                    | AHRQ Comparative Effectiveness Reviews                                                                                                                                          | Study participants were not T2DM patients |
| 40             | S. Bangalore, et al.[32]            | 2008                    | Perioperative beta blockers in patients having non-cardiac surgery: a meta-analysis                                                                                             | Study participants were not T2DM patients |
| 41             | M. Barbanti, et al.[33]             | 2016                    | Three-Year Outcomes of Transcatheter Aortic Valve Implantation in Patients With Varying Levels of Surgical Risk (from the CoreValve ADVANCE Study)                              | Intervention group is not OHA             |

| <b>Study #</b> | <b>Author</b>                      | <b>Publication year</b> | <b>Title</b>                                                                                                                                                                                                                                             | <b>Reason for exclusion</b>               |
|----------------|------------------------------------|-------------------------|----------------------------------------------------------------------------------------------------------------------------------------------------------------------------------------------------------------------------------------------------------|-------------------------------------------|
| 42             | M. Barkagan, et al.[34]            | 2016                    | Impact of routine manual aspiration thrombectomy on outcomes of patients undergoing primary percutaneous coronary intervention for acute myocardial infarction: A meta-analysis                                                                          | Study participants were not T2DM patients |
| 43             | F. C. Barreto, et al.[35]          | 2014                    | Effects of pyrophosphate delivery in a peritoneal dialysis solution on bone tissue of apolipoprotein-E knockout mice with chronic kidney disease                                                                                                         | Study participants were not T2DM patients |
| 45             | A. Baumbach, et al.[36]            | 2015                    | Safety and performance of a novel embolic deflection device in patients undergoing transcatheter aortic valve replacement: results from the DEFLECT I study                                                                                              | Study participants were not T2DM patients |
| 46             | G. Belcher, et al.[37]             | 2004                    | Cardiovascular effects of treatment of type 2 diabetes with pioglitazone, metformin and gliclazide                                                                                                                                                       | Study design is not RCT                   |
| 47             | O. Berwanger, et al.[38]           | 2016                    | Association between pre-operative statin use and major cardiovascular complications among patients undergoing non-cardiac surgery: the VISION study                                                                                                      | Study participants were not T2DM patients |
| 49             | V. Bittner, et al.[39]             | 2015                    | Comprehensive cardiovascular risk factor control improves survival: The BARI 2D trial                                                                                                                                                                    | Intervention group is not OHA             |
| 50             | J. E. Blair, et al.[40]            | 2008                    | Continental differences in clinical characteristics, management, and outcomes in patients hospitalized with worsening heart failure results from the EVEREST (Efficacy of Vasopressin Antagonism in Heart Failure: Outcome Study with Tolvaptan) program | Study participants were not T2DM patients |
| 51             | S. Bolen, et al.[41]               | 2016                    | AHRQ Comparative Effectiveness Reviews                                                                                                                                                                                                                   | Study design is not RCT                   |
| 52             | C. Bouchardy, et al.[42]           | 2010                    | Excess of cardiovascular mortality among node-negative breast cancer patients irradiated for inner-quadrant tumors                                                                                                                                       | Study participants were not T2DM patients |
| 53             | R. Boussageon, et al.[43]          | 2014                    | Effects of pharmacological treatments on micro- and macrovascular complications of type 2 diabetes: What is the level of evidence?                                                                                                                       | Study design is not RCT                   |
| 55             | S. J. Brecker, et al.[44]          | 2016                    | Impact of Anesthesia Type on Outcomes of Transcatheter Aortic Valve Implantation (from the Multicenter ADVANCE Study)                                                                                                                                    | Study participants were not T2DM patients |
| 56             | C. R. Bridges[45]                  | 2003                    | Cardiac surgery in African Americans                                                                                                                                                                                                                     | Study participants were not T2DM patients |
| 57             | D. I. Bromage and D. M. Yellon[46] | 2015                    | The pleiotropic effects of metformin: Time for prospective studies                                                                                                                                                                                       | Study participants were not T2DM patients |
| 58             | L. C. Brown, et al.[47]            | 2011                    | Incidence of cardiovascular events and death after open or endovascular repair of abdominal aortic aneurysm in the randomized EVAR trial 1                                                                                                               | Study participants were not T2DM patients |
| 59             | S. Buhse, et al.[48]               | 2016                    | The 'Old' anti-diabetic agents: A systematic inventory                                                                                                                                                                                                   | Study design is not RCT                   |

| Study # | Author                             | Publication year | Title                                                                                                                                                                                                                                                                    | Reason for exclusion                       |
|---------|------------------------------------|------------------|--------------------------------------------------------------------------------------------------------------------------------------------------------------------------------------------------------------------------------------------------------------------------|--------------------------------------------|
| 60      | M. Burgmaier, et al.[49]           | 2013             | Cardiovascular effects of GLP-1 and GLP-1-based therapies: Implications for the cardiovascular continuum in diabetes?                                                                                                                                                    | Study design is not RCT                    |
| 61      | C. V. Calkin, et al.[50]           | 2013             | The relationship between bipolar disorder and type 2 diabetes: More than just co-morbid disorders                                                                                                                                                                        | Cardiovascular mortality is not an outcome |
| 62      | K. Cao, et al.[51]                 | 2015             | Association of an inter-arm systolic blood pressure difference with all-cause and cardiovascular mortality: An updated meta-analysis of cohort studies                                                                                                                   | Study participants were not T2DM patients  |
| 63      | D. M. Carty, et al.[52]            | 2013             | Cardiovascular safety and GLP-1 receptor agonists                                                                                                                                                                                                                        | Study design is not RCT                    |
| 64      | D. M. Carty, et al.[53]            | 2013             | Cardiovascular safety and DPP-4 inhibitors                                                                                                                                                                                                                               | Study design is not RCT                    |
| 65      | Y. C. Chan, et al.[54]             | 2008             | Perioperative use of statins in non-cardiac surgery                                                                                                                                                                                                                      | Study participants were not T2DM patients  |
| 66      | L. Chen, et al.[55]                | 2016             | Long-term mortality after parathyroidectomy among chronic kidney disease patients with secondary hyperparathyroidism: a systematic review and meta-analysis                                                                                                              | Study participants were not T2DM patients  |
| 67      | N. D. Cohen, et al.[56]            | 2013             | The rationale for combining GLP-1 receptor agonists with basal insulin                                                                                                                                                                                                   | Study design is not RCT                    |
| 68      | G. Coluzzi, et al.[57]             | 2012             | EuroThrombosis: Annual meeting of the European Society of Cardiology Working Group on Thrombosis                                                                                                                                                                         | Study participants were not T2DM patients  |
| 69      | J. V. Conte, et al.[58]            | 2016             | Transcatheter or Surgical Aortic Valve Replacement in Patients With Prior Coronary Artery Bypass Grafting                                                                                                                                                                | Study participants were not T2DM patients  |
| 70      | S. D. Corathers, et al.[59]        | 2013             | Complications of Diabetes Therapy                                                                                                                                                                                                                                        | Study design is not RCT                    |
| 71      | R. Cruz U and L. M. Letelier S[60] | 2009             | Critically appraised article: Long-term risk of cardiovascular events with rosiglitazone: A meta-analysis                                                                                                                                                                | Study design is not RCT                    |
| 72      | G. R. Dagenais, et al.[61]         | 2006             | Angiotensin-converting-enzyme inhibitors in stable vascular disease without left ventricular systolic dysfunction or heart failure: a combined analysis of three trials                                                                                                  | Study participants were not T2DM patients  |
| 73      | J. S. Dahl, et al.[62]             | 2013             | Relation of osteoprotegerin in severe aortic valve stenosis to postoperative outcome and left ventricular function                                                                                                                                                       | Study participants were not T2DM patients  |
| 74      | J. S. Dahl, et al.[63]             | 2012             | Global strain in severe aortic valve stenosis: relation to clinical outcome after aortic valve replacement                                                                                                                                                               | Study participants were not T2DM patients  |
| 75      | P. Damman, et al.[64]              | 2012             | Long-term cardiovascular mortality after procedure-related or spontaneous myocardial infarction in patients with non-ST-segment elevation acute coronary syndrome: a collaborative analysis of individual patient data from the FRISC II, ICTUS, and RITA-3 trials (FIR) | Study participants were not T2DM patients  |

| Study # | Author                              | Publication year | Title                                                                                                                                                                                            | Reason for exclusion                       |
|---------|-------------------------------------|------------------|--------------------------------------------------------------------------------------------------------------------------------------------------------------------------------------------------|--------------------------------------------|
| 76      | D. E. W. DD, et al.[65]             | 2017             | Asymptomatic carotid artery stenosis: who should be screened, who should be treated and how should we treat them?                                                                                | Study participants were not T2DM patients  |
| 77      | J. de Jager, et al.[66]             | 2014             | Long-term effects of metformin on endothelial function in type 2 diabetes: A randomized controlled trial                                                                                         | Cardiovascular mortality is not an outcome |
| 78      | S. De Servi, et al.[67]             | 2011             | Treating acute coronary syndromes with new antiplatelet drugs: the mortality issue with prasugrel and ticagrelor                                                                                 | Study participants were not T2DM patients  |
| 79      | K. M. Detre and R. Holubkov[68]     | 2002             | Coronary revascularization on balance: Robert L. Frye lecture                                                                                                                                    | Study participants were not T2DM patients  |
| 80      | P. J. Devereaux, et al.[69]         | 2005             | How strong is the evidence for the use of perioperative beta blockers in non-cardiac surgery? Systematic review and meta-analysis of randomised controlled trials                                | Intervention group is not OHA              |
| 81      | P. J. Devereaux, et al.[70]         | 2006             | Rationale, design, and organization of the PeriOperative ISchemic Evaluation (POISE) trial: a randomized controlled trial of metoprolol versus placebo in patients undergoing noncardiac surgery | Intervention group is not OHA              |
| 82      | A. Diaz, et al.[71]                 | 2005             | Long-term prognostic value of resting heart rate in patients with suspected or proven coronary artery disease                                                                                    | Study participants were not T2DM patients  |
| 84      | J. P. Domecq, et al.[72]            | 2013             | Adverse effects of the common treatments for polycystic ovary syndrome: a systematic review and meta-analysis                                                                                    | Study participants were not T2DM patients  |
| 85      | L. Du, et al.[73]                   | 2014             | Cardiovascular safety of sulphonylurea: Comment on the study by Monami et al                                                                                                                     | Study design is not RCT                    |
| 86      | R. Duarte[74]                       | 2013             | Oral antidiabetic drugs. How to begin and combine without cardiovascular risk                                                                                                                    | Study design is not RCT                    |
| 87      | C. J. Dunn and D. H. Peters[75]     | 1995             | Metformin: A Review of its Pharmacological Properties and Therapeutic Use in Non—Insulin-Dependent Diabetes Mellitus                                                                             | Study design is not RCT                    |
| 88      | J. B. Echouffo-Tcheugui, et al.[76] | 2009             | The ADDITION-Cambridge trial protocol: a cluster -- randomised controlled trial of screening for type 2 diabetes and intensive treatment for screen-detected patients                            | Study design is not RCT                    |
| 90      | M. F. Eleid, et al.[77]             | 2014             | Renal denervation for hypertension                                                                                                                                                               | Study participants were not T2DM patients  |
| 91      | I. Y. Elgendy, et al.[78]           | 2016             | Cardiovascular Safety of Dipeptidyl-Peptidase IV Inhibitors: A Meta-Analysis of Placebo-Controlled Randomized Trials                                                                             | Study design is not RCT                    |
| 92      | E. G. Elias, et al.[79]             | 1994             | Breast cancer prevention trial                                                                                                                                                                   | Study participants were not T2DM patients  |
| 93      | S. S. Engel, et al.[80]             | 2013             | Cardiovascular safety of sitagliptin in patients with type 2 diabetes mellitus: A pooled analysis                                                                                                | Study design is not RCT                    |
| 94      | E. Erdmann, et al.[81]              | 2014             | Observational follow-up of the PROactive study: A 6-year update                                                                                                                                  | Study design is not RCT                    |

| <b>Study #</b> | <b>Author</b>                        | <b>Publication year</b> | <b>Title</b>                                                                                                                                                                     | <b>Reason for exclusion</b>               |
|----------------|--------------------------------------|-------------------------|----------------------------------------------------------------------------------------------------------------------------------------------------------------------------------|-------------------------------------------|
| 95             | D. R. Erlich, et al.[82]             | 2013                    | Diabetes update: screening and diagnosis                                                                                                                                         | Study design is not RCT                   |
| 96             | C. Eshelbrenner, et al.[83]          | 2012                    | The cardiologist's role in the management of type 2 diabetes-a review                                                                                                            | Study design is not RCT                   |
| 97             | J. A. Fallavollita, et al.[84]       | 2006                    | Prediction of arrhythmic events with positron emission tomography: PAREPET study design and methods                                                                              | Study design is not RCT                   |
| 98             | A. Fayad, et al.[85]                 | 2016                    | Perioperative Diastolic Dysfunction in Patients Undergoing Noncardiac Surgery Is an Independent Risk Factor for Cardiovascular Events: A Systematic Review and Meta-analysis     | Study design is not RCT                   |
| 99             | S. Ferlito[86]                       | 1991                    | [Platelet antiaggregants in the treatment of arterial thrombosis]                                                                                                                | Study participants were not T2DM patients |
| 100            | E. Fernando, et al.[87]              | 2015                    | Cardiovascular Disease in South Asian Migrants                                                                                                                                   | Study participants were not T2DM patients |
| 101            | E. Ferrannini and R. A. DeFronzo[88] | 2015                    | Impact of glucose-lowering drugs on cardiovascular disease in type 2 diabetes                                                                                                    | Study design is not RCT                   |
| 102            | J. P. Ferreira, et al.[89]           | 2016                    | Spot urine sodium excretion as prognostic marker in acutely decompensated heart failure: the spironolactone effect                                                               | Study participants were not T2DM patients |
| 103            | K. J. Filipiak[90]                   | 2000                    | [Sulphonylurea derivatives and the cardiovascular system]                                                                                                                        | Study design is not RCT                   |
| 104            | M. Fisher, et al.[91]                | 2015                    | Cardiovascular safety of albiglutide in the Harmony programme: A meta-analysis                                                                                                   | Study design is not RCT                   |
| 105            | S. A. Fisher, et al.[92]             | 2015                    | Stem cell treatment for acute myocardial infarction                                                                                                                              | Intervention group is not OHA             |
| 106            | F. Foltran, et al.[93]               | 2010                    | Nutritional profiles in a public health perspective: a critical review                                                                                                           | Study participants were not T2DM patients |
| 107            | T. Forst, et al.[94]                 | 2013                    | Association of sulphonylurea treatment with all-cause and cardiovascular mortality: a systematic review and meta-analysis of observational studies                               | Study design is not RCT                   |
| 109            | E. B. Friedrich, et al.[95]          | 2006                    | ACE inhibition in secondary prevention: are the results controversial?                                                                                                           | Intervention group is not OHA             |
| 110            | J. O. Friedrich, et al.[96]          | 2009                    | Rosiglitazone: can meta-analysis accurately estimate excess cardiovascular risk given the available data? Re-analysis of randomized trials using various methodologic approaches | Study design is not RCT                   |
| 111            | Y. Fu, et al.[97]                    | 2016                    | Meta-analysis of all-cause and cardiovascular mortality in obstructive sleep apnea with or without continuous positive airway pressure treatment                                 | Study participants were not T2DM patients |
| 112            | S. Fumagalli, et al.[98]             | 2012                    | Characteristics, management and prognosis of elderly patients in the Euro Heart Survey on atrial fibrillation                                                                    | Study participants were not T2DM patients |
| 113            | P. Galan, et al.[99]                 | 2009                    | The scientific basis of the SU.FOL.OM3 study: A secondary intervention trial of folate, B6 and B12 vitamins and/or omega3 fatty acid                                             | Study participants were not T2DM patients |



| Study # | Author                             | Publication year | Title                                                                                                                                                                                                                                                                                                                                         | Reason for exclusion                       |
|---------|------------------------------------|------------------|-----------------------------------------------------------------------------------------------------------------------------------------------------------------------------------------------------------------------------------------------------------------------------------------------------------------------------------------------|--------------------------------------------|
|         |                                    |                  | supplements in the prevention of recurrent ischemic events                                                                                                                                                                                                                                                                                    |                                            |
| 114     | P. Galan, et al.[100]              | 2003             | Background and rationale of the SU.FOL.OM3 study: double-blind randomized placebo-controlled secondary prevention trial to test the impact of supplementation with folate, vitamin B6 and B12 and/or omega-3 fatty acids on the prevention of recurrent ischemic events in subjects with atherosclerosis in the coronary or cerebral arteries | Study participants were not T2DM patients  |
| 115     | B. Gallwitz and R. G. Bretzel[101] | 2013             | How do we continue treatment in patients with type 2 diabetes when therapeutic goals are not reached with oral antidiabetes agents and lifestyle? incretin versus insulin treatment                                                                                                                                                           | Study design is not RCT                    |
| 116     | A. N. Ganesan, et al.[102]         | 2012             | Role of AV nodal ablation in cardiac resynchronization in patients with coexistent atrial fibrillation and heart failure a systematic review                                                                                                                                                                                                  | Intervention group is not OHA              |
| 117     | A. Garber, et al.[103]             | 2013             | American association of clinical endocrinologists' comprehensive diabetes management algorithm 2013 consensus statement                                                                                                                                                                                                                       | Study design is not RCT                    |
| 118     | H. Gasparovic, et al.[104]         | 2014             | Impact of remote ischemic preconditioning preceding coronary artery bypass grafting on inducing neuroprotection (RIPCAGE): study protocol for a randomized controlled trial                                                                                                                                                                   | Study participants were not T2DM patients  |
| 119     | M. Gaztañaga and J. Crook[105]     | 2012             | Androgen deprivation therapy: Minimizing exposure and mitigating side effects                                                                                                                                                                                                                                                                 | Intervention group is not OHA              |
| 120     | C. M. George, et al.[106]          | 2015             | Management of blood glucose with noninsulin therapies in type 2 diabetes                                                                                                                                                                                                                                                                      | Study design is not RCT                    |
| 122     | H. C. Gerstein, et al.[107]        | 2014             | Effects of intensive glycaemic control on ischaemic heart disease: Analysis of data from the randomised, controlled ACCORD trial                                                                                                                                                                                                              | Cardiovascular mortality is not an outcome |
| 123     | B. Geudelin[108]                   | 2015             | Treating Atherosclerotic Disease: A Still-Unsolved Challenge                                                                                                                                                                                                                                                                                  | Study participants were not T2DM patients  |
| 124     | P. Ghody, et al.[109]              | 2015             | Identifying prediabetes - Is it beneficial in the long run?                                                                                                                                                                                                                                                                                   | Study participants were not T2DM patients  |
| 125     | A. A. Ghotbi, et al.[110]          | 2013             | Association of hypoglycemic treatment regimens with cardiovascular outcomes in overweight and obese subjects with type 2 diabetes: A substudy of the SCOUT trial                                                                                                                                                                              | Cardiovascular mortality is not an outcome |
| 128     | M. Gillett, et al.[111]            | 2012             | Non-pharmacological interventions to reduce the risk of diabetes in people with impaired glucose regulation: a systematic review and economic evaluation                                                                                                                                                                                      | Intervention group is not OHA              |
| 129     | A. K. Gitt, et al.[112]            | 2012             | Should antidiabetic treatment of type 2 diabetes in patients with heart failure differ from that in patients without?                                                                                                                                                                                                                         | Study design is not RCT                    |
| 130     | A. S. Godinho, et al.[113]         | 2012             | On-pump versus off-pump coronary-artery bypass surgery: a meta-analysis                                                                                                                                                                                                                                                                       | Study participants were not T2DM patients  |

| Study # | Author                                  | Publication year | Title                                                                                                                                                                                      | Reason for exclusion                      |
|---------|-----------------------------------------|------------------|--------------------------------------------------------------------------------------------------------------------------------------------------------------------------------------------|-------------------------------------------|
| 131     | A. Goyal, et al.[114]                   | 2013             | Serum antioxidant nutrients, vitamin A, and mortality in U.S. Adults                                                                                                                       | Intervention group is not OHA             |
| 132     | L. Graffouillère, et al.[115]           | 2016             | Prospective association between the Dietary Inflammatory Index and mortality: Modulation by antioxidant supplementation in the SU.VI.MAX randomized controlled trial                       | Intervention group is not OHA             |
| 133     | G. Grenet, et al.[116]                  | 2016             | Protocol of GLUCOSE COnTrol Safety and Efficacy in type 2 DIabetes, a NETwork meta-analysis:GLUCOSE DINET protocol - Rational and design                                                   | Study design is not RCT                   |
| 134     | S. J. Griffin, et al.[117]              | 2011             | Effect of early intensive multifactorial therapy on 5-year cardiovascular outcomes in individuals with type 2 diabetes detected by screening (ADDITION-Europe): A cluster-randomised trial | Intervention group is not OHA             |
| 135     | N. Grondal, et al.[118]                 | 2010             | The Viborg Vascular (VIVA) screening trial of 65-74 year old men in the central region of Denmark: study protocol                                                                          | Intervention group is not OHA             |
| 136     | B. Guida, et al.[119]                   | 2014             | Effect of short-term synbiotic treatment on plasma p-cresol levels in patients with chronic renal failure: a randomized clinical trial                                                     | Intervention group is not OHA             |
| 137     | S. Hajibandeh, et al.[120]              | 2016             | Prognostic significance of ankle brachial pressure index: A systematic review and meta-analysis                                                                                            | Intervention group is not OHA             |
| 138     | F. A. Hakim and A. Pflueger[121]        | 2010             | Role of oxidative stress in diabetic kidney disease                                                                                                                                        | Study participants were not T2DM patients |
| 139     | O. P. R. Hamnvik and G. T. McMahon[122] | 2009             | Glycemic targets for patients with type 2 diabetes mellitus                                                                                                                                | Study design is not RCT                   |
| 140     | M. Hanefeld, et al.[123]                | 2013             | Cardiac implications of hypoglycaemia in patients with diabetes - a systematic review                                                                                                      | Study design is not RCT                   |
| 141     | W. Hanif and S. Kumar[124]              | 2001             | Nateglinide: A new rapid-acting insulinotropic agent                                                                                                                                       | Study design is not RCT                   |
| 142     | G. Hardy[125]                           | 2013             | Saxagliptin demonstrates no increased risk for cardiovascular death, heart attack or stroke in the SAVOR cardiovascular outcomes trial                                                     | Study design is not RCT                   |
| 143     | A. G. Hatrick, et al.[126]              | 2002             | Does GH replacement therapy in adult GH-deficient patients result in recurrence or increase in size of pituitary tumours?                                                                  | Study participants were not T2DM patients |
| 144     | H. J. Heerspink, et al.[127]            | 2016             | Sodium Glucose Cotransporter 2 Inhibitors in the Treatment of Diabetes Mellitus: Cardiovascular and Kidney Effects, Potential Mechanisms, and Clinical Applications                        | Study design is not RCT                   |
| 146     | A. Heilbrunn[128]                       | 2012             | Physical activity and type 2 diabetes mellitus                                                                                                                                             | Intervention group is not OHA             |
| 147     | B. Hemmingsen, et al.[129]              | 2012             | Comparison of metformin and insulin versus insulin alone for type 2 diabetes: systematic review of randomised clinical trials with meta-analyses and trial sequential analyses             | Study design is not RCT                   |
| 148     | B. Hemmingsen, et al.[130]              | 2011             | Intensive glycaemic control for patients with type 2 diabetes: Systematic review with meta-                                                                                                | Study design is not RCT                   |

| Study # | Author                             | Publication year | Title                                                                                                                                                                                   | Reason for exclusion                       |
|---------|------------------------------------|------------------|-----------------------------------------------------------------------------------------------------------------------------------------------------------------------------------------|--------------------------------------------|
|         |                                    |                  | analysis and trial sequential analysis of randomised clinical trials                                                                                                                    |                                            |
| 149     | B. Hemmingsen, et al.[131]         | 2013             | Sulphonylurea monotherapy for patients with type 2 diabetes mellitus                                                                                                                    | Study design is not RCT                    |
| 151     | B. Hemmingsen, et al.[132]         | 2014             | Sulfonylurea versus metformin monotherapy in patients with type 2 diabetes: a Cochrane systematic review and meta-analysis of randomized clinical trials and trial sequential analysis  | Study design is not RCT                    |
| 152     | B. Hemmingsen, et al.[133]         | 2016             | Insulin secretagogues for prevention or delay of type 2 diabetes mellitus and its associated complications in persons at increased risk for the development of type 2 diabetes mellitus | Study participants were not T2DM patients  |
| 153     | C. Hennequin, et al.[134]          | 2008             | [Irradiation of lymph nodes areas in breast cancer]                                                                                                                                     | Study participants were not T2DM patients  |
| 154     | T. S. Hermann, et al.[135]         | 2006             | Quinapril treatment increases insulin-stimulated endothelial function and adiponectin gene expression in patients with type 2 diabetes                                                  | Intervention group is not OHA              |
| 155     | B. Hirshberg and A. Katz[136]      | 2013             | Cardiovascular outcome studies with novel antidiabetes agents: Scientific and operational considerations                                                                                | Study design is not RCT                    |
| 156     | M. Ho, et al.[137]                 | 2014             | Effect of fat loss on arterial elasticity in obese adolescents with clinical insulin resistance: RESIST study                                                                           | Study participants were not T2DM patients  |
| 157     | S. E. Holden and C. J. Currie[138] | 2014             | Mortality risk with sulphonylureas compared to metformin                                                                                                                                | Study design is not RCT                    |
| 158     | R. R. Holman[139]                  | 2013             | Type 2 diabetes mellitus in 2012: Optimal management of T2DM remains elusive                                                                                                            | Study design is not RCT                    |
| 159     | R. R. Holman, et al.[140]          | 2014             | Cardiovascular outcome trials of glucose-lowering drugs or strategies in type 2 diabetes                                                                                                | Study design is not RCT                    |
| 162     | I. Hopper, et al.[141]             | 2011             | Prevention of diabetes and reduction in major cardiovascular events in studies of subjects with prediabetes: Meta-analysis of randomised controlled clinical trials                     | Study design is not RCT                    |
| 163     | J. V. Huang, et al.[142]           | 2012             | PPAR- $\gamma$ as a therapeutic target in cardiovascular disease: Evidence and uncertainty                                                                                              | Study participants were not T2DM patients  |
| 164     | W. Hueb, et al.[143]               | 2008             | A randomized comparative study of patients undergoing myocardial revascularization with or without cardiopulmonary bypass surgery: The MASS III Trial                                   | Study design is not RCT                    |
| 165     | J. Iqbal, et al.[144]              | 2014             | Effect of eplerenone in percutaneous coronary intervention-treated post-myocardial infarction patients with left ventricular systolic dysfunction: a subanalysis of the EPHEBUS trial   | exclude: participant                       |
| 166     | D. R. Janero[145]                  | 2014             | Synthetic agents in the context of metabolic/bariatric surgery: Expanding the scope and impact of diabetes drug discovery                                                               | Cardiovascular mortality is not an outcome |

| Study # | Author                            | Publication year | Title                                                                                                                                                                                                                              | Reason for exclusion                       |
|---------|-----------------------------------|------------------|------------------------------------------------------------------------------------------------------------------------------------------------------------------------------------------------------------------------------------|--------------------------------------------|
| 167     | P. Jerie[146]                     | 2003             | [New aspects in clinical cardiology: sex-based differences in cardiovascular morbidity and mortality]                                                                                                                              | Study participants were not T2DM patients  |
| 168     | K. G. Jones, et al.[147]          | 2001             | Interleukin-6 (IL-6) and the prognosis of abdominal aortic aneurysms                                                                                                                                                               | Study participants were not T2DM patients  |
| 169     | M. Jun, et al.[148]               | 2012             | Antioxidants for chronic kidney disease                                                                                                                                                                                            | Study participants were not T2DM patients  |
| 170     | P. Kahlert, et al.[149]           | 2017             | No protection of heart, kidneys and brain by remote ischemic preconditioning before transfemoral transcatheter aortic valve implantation: Interim-analysis of a randomized single-blinded, placebo-controlled, single-center trial | Study participants were not T2DM patients  |
| 171     | S. V. Kakorin, et al.[150]        | 2016             | Glycemia control and glucose-lowering therapy in patients with type 2 diabetes mellitus and cardiovascular disease (review of multicenter randomized trials)                                                                       | Study design is not RCT                    |
| 172     | R. C. Kalayjian, et al.[151]      | 2014             | Proteinuria is associated with neurocognitive impairment in antiretroviral therapy treated HIV-infected individuals                                                                                                                | Study participants were not T2DM patients  |
| 173     | D. E. Kandzari, et al.[152]       | 2012             | Catheter-based renal denervation for resistant hypertension: rationale and design of the SYMPLICITY HTN-3 Trial                                                                                                                    | Study participants were not T2DM patients  |
| 174     | B. A. Kappel, et al.[153]         | 2015             | Oral hypoglycemic agents and the heart failure conundrum: Lessons from and for outcome trials                                                                                                                                      | Study design is not RCT                    |
| 175     | T. Karagiannis, et al.[154]       | 2015             | Cardiovascular risk with DPP-4 inhibitors: latest evidence and clinical implications                                                                                                                                               | Study design is not RCT                    |
| 176     | D. Karásek[155]                   | 2016             | EMPA-REG OUTCOME and reduction of the risk of heart failure in patients with diabetes                                                                                                                                              | Study design is not RCT                    |
| 177     | T. Kasai, et al.[156]             | 2008             | Propensity analysis of 12 years outcome after bypass graft or balloon angioplasty in patients with multivessel coronary artery disease                                                                                             | Study participants were not T2DM patients  |
| 178     | L. Kezerle, et al.[157]           | 2014             | Treating the elderly diabetic patient: Special considerations                                                                                                                                                                      | Cardiovascular mortality is not an outcome |
| 179     | B. Kiaii, et al.[158]             | 2015             | Postoperative atrial fibrillation is not pulmonary vein dependent: results from a randomized trial                                                                                                                                 | Study participants were not T2DM patients  |
| 180     | R. J. King and P. J. Grant[159]   | 2016             | Diabetes and cardiovascular disease: pathophysiology of a life-threatening epidemic                                                                                                                                                | Intervention group is not OHA              |
| 181     | M. G. Kirby[160]                  | 2012             | Sixty years of diabetes management in primary care                                                                                                                                                                                 | Cardiovascular mortality is not an outcome |
| 184     | M. Kowalewski, et al.[161]        | 2015             | Complete revascularisation in ST-elevation myocardial infarction and multivessel disease: meta-analysis of randomised controlled trials                                                                                            | Study participants were not T2DM patients  |
| 186     | A. J. Krentz and M. Hompesch[162] | 2014             | Cardiovascular safety of new drugs for diabetes: Getting the balance right?                                                                                                                                                        | Study design is not RCT                    |

| <b>Study #</b> | <b>Author</b>                    | <b>Publication year</b> | <b>Title</b>                                                                                                                                                          | <b>Reason for exclusion</b>                |
|----------------|----------------------------------|-------------------------|-----------------------------------------------------------------------------------------------------------------------------------------------------------------------|--------------------------------------------|
| 187            | L. T. Krogsboll, et al.[163]     | 2012                    | General health checks in adults for reducing morbidity and mortality from disease                                                                                     | Study participants were not T2DM patients  |
| 188            | P. Kumarathurai, et al.[164]     | 2017                    | Effects of Liraglutide on Heart Rate and Heart Rate Variability: A Randomized, Double-Blind, Placebo-Controlled Crossover Study                                       | Intervention group is not OHA              |
| 189            | M. Kvapil[165]                   | 2016                    | The role of sitagliptin in the treatment of type 2 diabetes based on the results of the TECOS study                                                                   | Full article not available                 |
| 190            | Y. Kwon, et al.[166]             | 2017                    | Body Mass Index-Related Mortality in Patients with Type 2 Diabetes and Heterogeneity in Obesity Paradox Studies: A Dose-Response Meta-Analysis                        | Cardiovascular mortality is not an outcome |
| 191            | C. Lamas Oliveira[167]           | 2013                    | Metabolic consequences of craniopharyngioma and their management                                                                                                      | Study participants were not T2DM patients  |
| 192            | A. Lamy, et al.[168]             | 2012                    | Rationale and design of the coronary artery bypass grafting surgery off or on pump revascularization study: a large international randomized trial in cardiac surgery | Intervention group is not OHA              |
| 193            | M. J. Landray, et al.[169]       | 2002                    | The cardioprotective role of $\beta$ -blockers in patients with diabetes mellitus                                                                                     | Intervention group is not OHA              |
| 194            | A. M. Lee and E. L. Chaikof[170] | 2013                    | Is the abdominal aortic aneurysm rupture rate decreasing?                                                                                                             | Study participants were not T2DM patients  |
| 196            | J. Lexchin[171]                  | 2013                    | Use of surrogate outcomes in medical journal advertising in Canada                                                                                                    | Study participants were not T2DM patients  |
| 197            | E. Lim, et al.[172]              | 2008                    | Composite outcomes in cardiovascular research: a survey of randomized trials                                                                                          | Study design is not RCT                    |
| 198            | J. S. Lindholt[173]              | 2007                    | Relatively high pulmonary and cardiovascular mortality rates in screening-detected aneurysmal patients without previous hospital admissions                           | Study participants were not T2DM patients  |
| 199            | J. S. Lindholt[174]              | 2010                    | Abdominal aortic aneurysms                                                                                                                                            | Study participants were not T2DM patients  |
| 200            | J. Lisspers, et al.[175]         | 2005                    | Long-term effects of lifestyle behavior change in coronary artery disease: effects on recurrent coronary events after percutaneous coronary intervention              | Study participants were not T2DM patients  |
| 201            | Y. Liu, et al.[176]              | 2013                    | Inhalation of diesel exhaust does not exacerbate cardiac hypertrophy or heart failure in two mouse models of cardiac hypertrophy                                      | Study participants were not T2DM patients  |
| 202            | R. A. Lobo, et al.[177]          | 2014                    | Prevention of diseases after menopause                                                                                                                                | Study participants were not T2DM patients  |
| 203            | A. Loimaala, et al.[178]         | 2009                    | Effect of Long-Term Endurance and Strength Training on Metabolic Control and Arterial Elasticity in Patients With Type 2 Diabetes Mellitus                            | Intervention group is not OHA              |

| <b>Study #</b> | <b>Author</b>                         | <b>Publication year</b> | <b>Title</b>                                                                                                                                                                                                                                   | <b>Reason for exclusion</b>                |
|----------------|---------------------------------------|-------------------------|------------------------------------------------------------------------------------------------------------------------------------------------------------------------------------------------------------------------------------------------|--------------------------------------------|
| 204            | A. Lonardo, et al.[179]               | 2015                    | Diagnosis and management of cardiovascular risk in nonalcoholic fatty liver disease                                                                                                                                                            | Study participants were not T2DM patients  |
| 205            | A. Losito, et al.[180]                | 2005                    | Long-term follow-up of atherosclerotic renovascular disease. Beneficial effect of ACE inhibition                                                                                                                                               | Study participants were not T2DM patients  |
| 206            | S. S. Lund and Y. Gong[181]           | 2014                    | Effects of metformin versus glipizide on cardiovascular outcomes in patients with type 2 diabetes and coronary artery disease. Diabetes Care 2013;36:1304-1311                                                                                 | Study design is not RCT                    |
| 207            | A. Luthra and A. Misra[182]           | 2016                    | Drug approvals in India - Authors' reply                                                                                                                                                                                                       | Study design is not RCT                    |
| 208            | M. A. Maglione, et al.[183]           | 2013                    | AHRQ Comparative Effectiveness Reviews                                                                                                                                                                                                         | Study design is not RCT                    |
| 209            | K. W. Mahaffey, et al.[184]           | 2013                    | Results of a reevaluation of cardiovascular outcomes in the RECORD trial                                                                                                                                                                       | Study design is not RCT                    |
| 210            | K. Mahmood, et al.[185]               | 2013                    | Metformin: The hidden chronicles of a magic drug                                                                                                                                                                                               | Cardiovascular mortality is not an outcome |
| 211            | A. N. Mahmoud, et al.[186]            | 2016                    | Does Gender Influence the Cardiovascular Benefits Observed with Sodium Glucose Co-Transporter-2 (SGLT-2) Inhibitors? A Meta-Regression Analysis                                                                                                | Study design is not RCT                    |
| 212            | R. R. Makkar, et al.[187]             | 2013                    | Determinants and outcomes of acute transcatheter valve-in-valve therapy or embolization: a study of multiple valve implants in the U.S. PARTNER trial (Placement of AoRTic TraNscathetER Valve Trial Edwards SAPIEN Transcatheter Heart Valve) | Study participants were not T2DM patients  |
| 213            | M. C. Mann, et al.[188]               | 2015                    | Effect of oral vitamin D analogs on mortality and cardiovascular outcomes among adults with chronic kidney disease: a meta-analysis                                                                                                            | Study participants were not T2DM patients  |
| 214            | E. Mannucci, et al.[189]              | 2010                    | Cardiac safety profile of rosiglitazone: a comprehensive meta-analysis of randomized clinical trials                                                                                                                                           | Study design is not RCT                    |
| 215            | E. Mannucci, et al.[190]              | 2008                    | Pioglitazone and cardiovascular risk. A comprehensive meta-analysis of randomized clinical trials                                                                                                                                              | Study design is not RCT                    |
| 216            | N. F. Marrouche and J. Brachmann[191] | 2009                    | Catheter ablation versus standard conventional treatment in patients with left ventricular dysfunction and atrial fibrillation (CASTLE-AF) - study design                                                                                      | Study participants were not T2DM patients  |
| 217            | S. P. Marso, et al.[192]              | 2010                    | The effect of intensive glucose control on all-cause and cardiovascular mortality, myocardial infarction and stroke in persons with type 2 diabetes mellitus: A systematic review and meta-analysis                                            | Study design is not RCT                    |
| 218            | N. M. Maruthur, et al.[193]           | 2016                    | Diabetes medications as monotherapy or metformin-based combination therapy for type 2 diabetes: A systematic review and meta-analysis                                                                                                          | Study design is not RCT                    |

| Study # | Author                      | Publication year | Title                                                                                                                                                                           | Reason for exclusion                                                                                                        |
|---------|-----------------------------|------------------|---------------------------------------------------------------------------------------------------------------------------------------------------------------------------------|-----------------------------------------------------------------------------------------------------------------------------|
| 219     | M. R. Mehra, et al.[194]    | 2007             | Rationale, design, and methods for the Transplant-Eligible Management of Congestive Heart Failure (TMAC) trial: a multicenter clinical outcomes trial using nesiritide for TMAC | Study participants were not T2DM patients                                                                                   |
| 220     | J. J. Meier, et al.[195]    | 2004             | Is impairment of ischaemic preconditioning by sulfonylurea drugs clinically important?                                                                                          | Study design is not RCT                                                                                                     |
| 222     | M. Meier and M. Hummel[196] | 2009             | Cardiovascular disease and intensive glucose control in type 2 diabetes mellitus: Moving practice toward evidence-based strategies                                              | Study design is not RCT                                                                                                     |
| 223     | L. G. Mellbin, et al.[197]  | 2008             | The impact of glucose lowering treatment on long-term prognosis in patients with type 2 diabetes and myocardial infarction: a report from the DIGAMI 2 trial                    | Intervention group is not OHA                                                                                               |
| 225     | A. Mikkola, et al.[198]     | 2007             | Ten-year survival and cardiovascular mortality in patients with advanced prostate cancer primarily treated by intramuscular polyestradiol phosphate or orchiectomy              | Study participants were not T2DM patients                                                                                   |
| 226     | S. Milic, et al.[199]       | 2015             | Nonalcoholic steatohepatitis: Emerging targeted therapies to optimize treatment options                                                                                         | Study participants were not T2DM patients                                                                                   |
| 227     | M. E. Miller, et al.[200]   | 2014             | Effects of randomization to intensive glucose control on adverse events, cardiovascular disease, and mortality in older versus younger adults in the ACCORD trial               | The comparison was between standard care and intensive care, therefore, the individual impact of each OHA could not be seen |
| 228     | M. Mishra, et al.[201]      | 2005             | The effect of atorvastatin on serum lipoproteins in acromegaly                                                                                                                  | Study participants were not T2DM patients                                                                                   |
| 229     | C. C. Mizzaci, et al.[202]  | 2017             | Ivabradine as adjuvant treatment for chronic heart failure                                                                                                                      | Study participants were not T2DM patients                                                                                   |
| 230     | M. Monami[203]              | 2013             | Metformin may not reduce cardiovascular risk or all-cause mortality                                                                                                             | Study design is not RCT                                                                                                     |
| 231     | M. Monami, et al.[204]      | 2013             | Fasting and post-prandial glucose and diabetic complication. A meta-analysis                                                                                                    | Study design is not RCT                                                                                                     |
| 232     | M. Monami, et al.[205]      | 2013             | Dipeptidyl peptidase-4 inhibitors and cardiovascular risk: A meta-analysis of randomized clinical trials                                                                        | Study design is not RCT                                                                                                     |
| 233     | M. Monami, et al.[206]      | 2017             | Effects of SGLT-2 inhibitors on mortality and cardiovascular events: a comprehensive meta-analysis of randomized controlled trials                                              | Study design is not RCT                                                                                                     |
| 234     | M. Monami, I., et al.[207]  | 2014             | Effects of glucagon-like peptide-1 receptor agonists on cardiovascular risk: A meta-analysis of randomized clinical trials                                                      | Intervention group is not OHA                                                                                               |
| 235     | M. Monami, et al.[208]      | 2013             | Cardiovascular safety of sulfonylureas: A meta-analysis of randomized clinical trials                                                                                           | Study design is not RCT                                                                                                     |
| 236     | W. E. Moody, et al.[209]    | 2016             | Cardiovascular Effects of Unilateral Nephrectomy in Living Kidney Donors                                                                                                        | Study participants were not T2DM patients                                                                                   |

| <b>Study #</b> | <b>Author</b>                            | <b>Publication year</b> | <b>Title</b>                                                                                                                                          | <b>Reason for exclusion</b>                |
|----------------|------------------------------------------|-------------------------|-------------------------------------------------------------------------------------------------------------------------------------------------------|--------------------------------------------|
| 237            | F. Mookadam, et al.[210]                 | 2012                    | Percutaneous closure of mitral paravalvular leaks: a systematic review and meta-analysis                                                              | Study participants were not T2DM patients  |
| 238            | J. Moore and K. Dungan[211]              | 2012                    | Glycemic Variability and Glycemic Control in the Acutely Ill Cardiac Patient                                                                          | Cardiovascular mortality is not an outcome |
| 239            | H. Morawietz, et al.[212]                | 2006                    | Endothelial Protection, AT1 blockade and Cholesterol-Dependent Oxidative Stress: the EPAS trial                                                       | Study participants were not T2DM patients  |
| 240            | A. Moreno-Ulloa and J. Moreno-Ulloa[213] | 2016                    | Mortality reduction among persons with type 2 diabetes: (-)-Epicatechin as add-on therapy to metformin?                                               | Study design is not RCT                    |
| 241            | K. Mostafaie, et al.[214]                | 2015                    | Beta-adrenergic blockers for perioperative cardiac risk reduction in people undergoing vascular surgery                                               | Study participants were not T2DM patients  |
| 242            | C. E. Murphy[215]                        | 2012                    | Review of the safety and efficacy of exenatide once weekly for the treatment of type 2 diabetes mellitus                                              | Study design is not RCT                    |
| 243            | S. Nadar, et al.[216]                    | 2003                    | Implications of the LIFE trial                                                                                                                        | Study participants were not T2DM patients  |
| 244            | H. Nasr, et al.[217]                     | 2015                    | Investigating the Effect of a Single Infusion of Reconstituted High-Density Lipoprotein in Patients with Symptomatic Carotid Plaques                  | Study participants were not T2DM patients  |
| 245            | T. M. Nazif, et al.[218]                 | 2014                    | Clinical implications of new-onset left bundle branch block after transcatheter aortic valve replacement: analysis of the PARTNER experience          | Study participants were not T2DM patients  |
| 246            | A. Nenna, et al.[219]                    | 2015                    | Basic and clinical research against advanced glycation end products (AGEs): New compounds to tackle cardiovascular disease and diabetic complications | Intervention group is not OHA              |
| 247            | P. L. Nguyen, et al.[220]                | 2015                    | Adverse effects of androgen deprivation therapy and strategies to mitigate them                                                                       | Study participants were not T2DM patients  |
| 249            | T. J. Niiranen, et al.[221]              | 2010                    | Home-measured blood pressure is a stronger predictor of cardiovascular risk than office blood pressure: the Finn-Home study                           | Study participants were not T2DM patients  |
| 250            | P. M. Nilsson and J. Diez[222]           | 2016                    | DPP-4 inhibition and blood pressure lowering in perspective                                                                                           | Study design is not RCT                    |
| 251            | S. E. Nissen[223]                        | 2012                    | Cardiovascular effects of diabetes drugs: Emerging from the dark ages                                                                                 | Study design is not RCT                    |
| 252            | S. E. Nissen and K. Wolski[224]          | 2010                    | Rosiglitazone revisited: an updated meta-analysis of risk for myocardial infarction and cardiovascular mortality                                      | Study design is not RCT                    |
| 253            | P. G. Noordzij, et al.[225]              | 2007                    | Increased preoperative glucose levels are associated with perioperative mortality in patients undergoing noncardiac, nonvascular surgery              | Study design is not RCT                    |
| 254            | M. Ohira, et al.[226]                    | 2014                    | Metformin reduces circulating malondialdehyde-modified low-density lipoprotein in type 2 diabetes mellitus                                            | Cardiovascular mortality is not an outcome |



| <b>Study #</b> | <b>Author</b>               | <b>Publication year</b> | <b>Title</b>                                                                                                                                                                                                                                                | <b>Reason for exclusion</b>                |
|----------------|-----------------------------|-------------------------|-------------------------------------------------------------------------------------------------------------------------------------------------------------------------------------------------------------------------------------------------------------|--------------------------------------------|
| 256            | M. Ohira, et al.[227]       | 2014                    | Pioglitazone improves the cardio-ankle vascular index in patients with type 2 diabetes mellitus treated with metformin                                                                                                                                      | Cardiovascular mortality is not an outcome |
| 257            | I. Olivotto, et al.[228]    | 2007                    | Surgical myectomy versus alcohol septal ablation for obstructive hypertrophic cardiomyopathy. Will there ever be a randomized trial?                                                                                                                        | Study participants were not T2DM patients  |
| 258            | S. J. Otto, et al.[229]     | 2006                    | Risk of cardiovascular mortality in prostate cancer patients in the Rotterdam randomized screening trial                                                                                                                                                    | Study participants were not T2DM patients  |
| 259            | S. C. Palmer, et al.[230]   | 2016                    | Comparison of Clinical Outcomes and Adverse Events Associated With Glucose-Lowering Drugs in Patients With Type 2 Diabetes: A Meta-analysis                                                                                                                 | Study design is not RCT                    |
| 260            | S. C. Palmer, et al.[231]   | 2013                    | Cinacalcet in patients with chronic kidney disease: a cumulative meta-analysis of randomized controlled trials                                                                                                                                              | Study participants were not T2DM patients  |
| 261            | A. Parolari, et al.[232]    | 2011                    | Do statins improve outcomes and delay the progression of non-rheumatic calcific aortic stenosis?                                                                                                                                                            | Study participants were not T2DM patients  |
| 262            | F. J. Pashkow[233]          | 1995                    | Rehabilitation in the patient after myocardial infarction with or without surgical management                                                                                                                                                               | Study participants were not T2DM patients  |
| 263            | W. Pawliszak, et al.[234]   | 2015                    | Off-pump versus on-pump coronary artery bypass grafting: Who benefits?                                                                                                                                                                                      | Study participants were not T2DM patients  |
| 264            | A. C. Pereira, et al.[235]  | 2007                    | Dynamic regulation of MTHFR mRNA expression and C677T genotype modulate mortality in coronary artery disease patients after revascularization                                                                                                               | Study participants were not T2DM patients  |
| 265            | M. C. Petrie, et al.[236]   | 2016                    | Ten-Year Outcomes After Coronary Artery Bypass Grafting According to Age in Patients With Heart Failure and Left Ventricular Systolic Dysfunction: An Analysis of the Extended Follow-Up of the STICH Trial (Surgical Treatment for Ischemic Heart Failure) | Study participants were not T2DM patients  |
| 266            | I. Petrovic, et al.[237]    | 2015                    | Radial artery vs saphenous vein graft used as the second conduit for surgical myocardial revascularization: long-term clinical follow-up                                                                                                                    | Study participants were not T2DM patients  |
| 269            | A. Pfurtner, et al.[238]    | 2007                    | Pioglitazone: update on an oral antidiabetic drug with antiatherosclerotic effects                                                                                                                                                                          | Study design is not RCT                    |
| 271            | O. J. Phung, et al.[239]    | 2013                    | Sulphonylureas and risk of cardiovascular disease: systematic review and meta-analysis                                                                                                                                                                      | Study design is not RCT                    |
| 272            | L. S. Piegas, et al.[240]   | 1999                    | The Organization to Assess Strategies for Ischemic Syndromes (OASIS) registry in patients with unstable angina                                                                                                                                              | Study participants were not T2DM patients  |
| 273            | H. Pihlstrom, et al.[241]   | 2014                    | Symmetric dimethylarginine as predictor of graft loss and all-cause mortality in renal transplant recipients                                                                                                                                                | Study participants were not T2DM patients  |
| 274            | A. L. Pimentel, et al.[242] | 2015                    | Renal posttransplantation diabetes mellitus: An overview                                                                                                                                                                                                    | Intervention group is not OHA              |

| <b>Study #</b> | <b>Author</b>                                | <b>Publication year</b> | <b>Title</b>                                                                                                                                              | <b>Reason for exclusion</b>                                                         |
|----------------|----------------------------------------------|-------------------------|-----------------------------------------------------------------------------------------------------------------------------------------------------------|-------------------------------------------------------------------------------------|
| 275            | J. V. Pinkerton, et al.[243]                 | 2013                    | Risk of first-time heart disease higher for hormone therapy users with metabolic syndrome                                                                 | Study participants were not T2DM patients                                           |
| 276            | F. Pistrosch, et al.[244]                    | 2004                    | In type 2 diabetes, rosiglitazone therapy for insulin resistance ameliorates endothelial dysfunction independent of glucose control                       | Cardiovascular mortality is not an outcome                                          |
| 277            | A. Plitt and R. P. Giugliano[245]            | 2014                    | Edoxaban: Review of pharmacology and key phase I to III clinical trials                                                                                   | Study participants were not T2DM patients                                           |
| 278            | G. Pogatsa[246]                              | 1995                    | Potassium channels in the cardiovascular system                                                                                                           | Study participants were not T2DM patients                                           |
| 279            | A. R. Pressl-Wenger and F. R. Jornayvaz[247] | 2016                    | Cardiovascular safety of antidiabetics                                                                                                                    | Study design is not RCT                                                             |
| 280            | G. Pugliese and S. Balducci[248]             | 2014                    | Navigator: Physical activity for cardiovascular health?                                                                                                   | Intervention group is not OHA                                                       |
| 281            | D. Radak, et al.[249]                        | 2000                    | Single center experience on eversion versus standard carotid endarterectomy: a prospective non-randomized study                                           | Study participants were not T2DM patients                                           |
| 282            | M. Radenković, et al.[250]                   | 2013                    | Therapeutic approach in the improvement of endothelial dysfunction: The current state of the art                                                          | Study participants were not T2DM patients                                           |
| 283            | R. P. Radermecker, et al.[251]               | 2008                    | Blood glucose control and cardiovascular disease in patients with type 2 diabetes. Results of ACCORD, ADVANCE and VA-Diabetes trials                      | The study is not in English                                                         |
| 284            | M. B. Rehman, et al.[252]                    | 2017                    | Efficacy and safety of DPP-4 inhibitors in patients with type 2 diabetes: Meta-analysis of placebo-controlled randomized clinical trials                  | Study design is not RCT                                                             |
| 285            | B. Richter, et al.[253]                      | 2006                    | Pioglitazone for type 2 diabetes mellitus                                                                                                                 | Study design is not RCT                                                             |
| 286            | B. Richter, et al.[254]                      | 2007                    | Rosiglitazone for type 2 diabetes mellitus                                                                                                                | Study design is not RCT                                                             |
| 287            | L. Robertson, et al.[255]                    | 2014                    | Pharmacological treatment of vascular risk factors for reducing mortality and cardiovascular events in patients with abdominal aortic aneurysm            | Study participants were not T2DM patients                                           |
| 289            | P. Robless, et al.[256]                      | 2007                    | Cilostazol for peripheral arterial disease                                                                                                                | Study participants were not T2DM patients                                           |
| 291            | I. Romon, et al.[257]                        | 2014                    | The excess mortality related to cardiovascular diseases and cancer among adults pharmacologically treated for diabetes-the 2001-2006 ENTRED cohort        | Study participants were not T2DM patients                                           |
| 292            | J. Rosenstock, et al.[258]                   | 2015                    | Cardiovascular safety of linagliptin in type 2 diabetes: A comprehensive patient-level pooled analysis of prospectively adjudicated cardiovascular events | It was a pooled analysis of previously published RCTs, but this study was not a RCT |
| 293            | A. B. Rossebo, et al.[259]                   | 2007                    | Design and baseline characteristics of the simvastatin and ezetimibe in aortic stenosis (SEAS) study                                                      | Study participants were not T2DM patients                                           |

| Study # | Author                                             | Publication year | Title                                                                                                                                                                                         | Reason for exclusion                                      |
|---------|----------------------------------------------------|------------------|-----------------------------------------------------------------------------------------------------------------------------------------------------------------------------------------------|-----------------------------------------------------------|
| 294     | L. E. Rutqvist, et al.[260]                        | 1992             | Cardiovascular mortality in a randomized trial of adjuvant radiation therapy versus surgery alone in primary breast cancer                                                                    | Study participants were not T2DM patients                 |
| 295     | L. Rydén, et al.[261]                              | 2013             | ESC guidelines on diabetes, pre-diabetes, and cardiovascular diseases developed in collaboration with the EASD                                                                                | Study design is not RCT                                   |
| 296     | R. E. J. Ryder[262]                                | 2015             | Pioglitazone has a dubious bladder cancer risk but an undoubted cardiovascular benefit                                                                                                        | Cardiovascular mortality is not an outcome                |
| 298     | M. Saad, et al.[263]                               | 2017             | Cardiovascular outcomes with sodium-glucose cotransporter-2 inhibitors in patients with type II diabetes mellitus: A meta-analysis of placebo-controlled randomized trials                    | Study design is not RCT                                   |
| 300     | P. A. Sarafidis, et al.[264]                       | 2017             | Blood pressure reduction in diabetes: lessons from ACCORD, SPRINT and EMPA-REG OUTCOME                                                                                                        | Study design is not RCT                                   |
| 301     | P. A. Sarafidis and A. Tsapas[265]                 | 2016             | Empagliflozin, cardiovascular outcomes, and mortality in type 2 diabetes: To the editor                                                                                                       | This was a letter to the editor and not an original study |
| 302     | G. Savarese, et al.[266]                           | 2015             | Cardiovascular effects of dipeptidyl peptidase-4 inhibitors in diabetic patients: A meta-analysis                                                                                             | Study design is not RCT                                   |
| 303     | A. J. Scheen[267]                                  | 2015             | SGLT2 inhibition: efficacy and safety in type 2 diabetes treatment                                                                                                                            | Study design is not RCT                                   |
| 304     | A. J. Scheen[268]                                  | 2015             | [EMPA-REG OUTCOME: Empagliflozin reduces mortality in patients with type 2 diabetes at high cardiovascular risk]                                                                              | The study is not in English                               |
| 305     | A. J. Scheen and B. Charbonnel[269]                | 2014             | Effects of glucose-lowering agents on vascular outcomes in type 2 diabetes: A critical reappraisal                                                                                            | Study design is not RCT                                   |
| 306     | G. Schernthaner, et al.[270]                       | 2014             | Safety and efficacy of the dipeptidyl peptidase-4 inhibitor linagliptin in elderly patients with type 2 diabetes: A comprehensive analysis of data from 1331 individuals aged $\geq 65$ years | Study design is not RCT                                   |
| 307     | G. Schernthaner and M. H. Schernthaner-Reiter[271] | 2015             | Therapy: Risk of metformin use in patients with T2DM and advanced CKD                                                                                                                         | Cardiovascular mortality is not an outcome                |
| 308     | D. Schneider and J. Hsia[272]                      | 2005             | Coronary heart disease prevention in menopausal women                                                                                                                                         | Study participants were not T2DM patients                 |
| 309     | R. W. Schrier, et al.[273]                         | 2007             | Appropriate blood pressure control in hypertensive and normotensive type 2 diabetes mellitus: A summary of the ABCD trial                                                                     | Intervention group is not OHA                             |
| 311     | N. Sekercioglu, et al.[274]                        | 2014             | Culprit vessel only vs immediate complete revascularization in patients with acute ST-segment elevation myocardial infarction: systematic review and meta-analysis                            | Study participants were not T2DM patients                 |
| 312     | A. Sharma, et al.[275]                             | 2017             | Surgical Treatment of Ischemic Mitral Regurgitation: Valve Repair Versus Replacement                                                                                                          | Study participants were not T2DM patients                 |
| 313     | A. Sharma, et al.[276]                             | 2016             | Role of Vorapaxar After Coronary Revascularization                                                                                                                                            | Study participants were not T2DM patients                 |

| Study # | Author                              | Publication year | Title                                                                                                                                                                                                           | Reason for exclusion                       |
|---------|-------------------------------------|------------------|-----------------------------------------------------------------------------------------------------------------------------------------------------------------------------------------------------------------|--------------------------------------------|
| 314     | A. Sharma, et al.[277]              | 2014             | Relationship of body mass index with total mortality, cardiovascular mortality, and myocardial infarction after coronary revascularization: evidence from a meta-analysis                                       | Intervention group is not OHA              |
| 315     | C. J. Shih, et al.[278]             | 2016             | Comparative effectiveness of angiotensin-converting-enzyme inhibitors and angiotensin II receptor blockers in patients with type 2 diabetes and retinopathy                                                     | Intervention group is not OHA              |
| 316     | M. Shkolnikova, et al.[279]         | 2009             | Biological mechanisms of disease and death in Moscow: rationale and design of the survey on Stress Aging and Health in Russia (SAHR)                                                                            | Study participants were not T2DM patients  |
| 317     | V. Simha and P. Shah[280]           | 2012             | The surgical cure for diabetes?                                                                                                                                                                                 | Intervention group is not OHA              |
| 318     | A. K. Singh[281]                    | 2014             | Deciding oral drugs after metformin in type 2 diabetes: An evidence-based approach                                                                                                                              | Study design is not RCT                    |
| 319     | A. K. Singh[282]                    | 2015             | Polemics of pioglitazone: An appraisal in 2015                                                                                                                                                                  | Cardiovascular mortality is not an outcome |
| 320     | S. Singh, et al.[283]               | 2007             | Long-term risk of cardiovascular events with rosiglitazone: a meta-analysis                                                                                                                                     | Study design is not RCT                    |
| 321     | B. Sinha and S. Ghosal[284]         | 2013             | Pioglitazone - Do we really need it to manage type 2 diabetes?                                                                                                                                                  | Study design is not RCT                    |
| 322     | R. J. Smith, et al.[285]            | 2016             | Evaluating the cardiovascular safety of new medications for type 2 diabetes: Time to reassess?                                                                                                                  | Study design is not RCT                    |
| 323     | D. Sola, et al.[286]                | 2015             | Sulfonylureas and their use in clinical practice                                                                                                                                                                | Study design is not RCT                    |
| 324     | J. W. Son and S. Kim[287]           | 2015             | Dipeptidyl peptidase 4 inhibitors and the risk of cardiovascular disease in patients with type 2 diabetes: A tale of three studies                                                                              | Study design is not RCT                    |
| 325     | L. Sondergaard, et al.[288]         | 2016             | Two-Year Outcomes in Patients With Severe Aortic Valve Stenosis Randomized to Transcatheter Versus Surgical Aortic Valve Replacement: The All-Comers Nordic Aortic Valve Intervention Randomized Clinical Trial | Study participants were not T2DM patients  |
| 326     | H. Sourij, et al.[289]              | 2006             | Effects of pioglitazone on endothelial function, insulin sensitivity, and glucose control in subjects with coronary artery disease and new-onset type 2 diabetes                                                | Cardiovascular mortality is not an outcome |
| 327     | J. Špinar and A. Šmahelová[290]     | 2013             | SAVOR-TIMI 53 - Saxagliptin and cardiovascular outcomes in patients with type 2 diabetes mellitus                                                                                                               | The study is not in English                |
| 328     | L. Sportiello, et al.[291]          | 2016             | The importance of Pharmacovigilance for the drug safety: Focus on cardiovascular profile of incretin-based therapy                                                                                              | Study design is not RCT                    |
| 329     | B. T. Srinivasan and M. Davies[292] | 2014             | Glycaemic management of type 2 diabetes                                                                                                                                                                         | It is review article and not RCT           |
| 330     | E. Stabile, et al.[293]             | 2014             | SAT-TAVI (single antiplatelet therapy for TAVI) study: a pilot randomized study comparing double to single antiplatelet therapy for transcatheter aortic valve implantation                                     | Study participants were not T2DM patients  |

| Study # | Author                                | Publication year | Title                                                                                                                                                                                                           | Reason for exclusion                       |
|---------|---------------------------------------|------------------|-----------------------------------------------------------------------------------------------------------------------------------------------------------------------------------------------------------------|--------------------------------------------|
| 331     | E. Standl, et al.[294]                | 2009             | The impact of glucose-lowering therapy on cardiovascular outcomes                                                                                                                                               | Study design is not RCT                    |
| 332     | S. Steiner[295]                       | 2016             | Empagliflozin, cardiovascular outcomes, and mortality in type 2 diabetes                                                                                                                                        | The study is not in English                |
| 333     | J. C. Stone, et al.[296]              | 2015             | Was there really any evidence that rosiglitazone increased the risk of myocardial infarction or death from cardiovascular causes?                                                                               | Study design is not RCT                    |
| 334     | M. C. Stoner and D. J. Defreitas[297] | 2010             | Process of care for carotid endarterectomy: perioperative medical management                                                                                                                                    | Study participants were not T2DM patients  |
| 335     | K. Strojek, et al.[298]               | 2016             | Empagliflozin. Results of the EMPA-REG OUTCOME trial. A breakthrough in treatment of type 2 diabetes?                                                                                                           | Study design is not RCT                    |
| 336     | S. Sultan and N. Hynes[299]           | 2012             | Cardiovascular disease: Primary prevention, disease modulation and regenerative therapy                                                                                                                         | Study participants were not T2DM patients  |
| 337     | G. Targher and C. Byrne[300]          | 2013             | Diagnosis and management of nonalcoholic fatty liver disease and its hemostatic/thrombotic and vascular complications                                                                                           | Study participants were not T2DM patients  |
| 338     | G. Tarsia, et al.[301]                | 2014             | Lower cardiovascular mortality with Medtronic CoreValve versus Edwards SAPIEN in patients with aortic valve stenosis undergoing transcatheter aortic valve implantation                                         | Study participants were not T2DM patients  |
| 339     | M. C. Tattersall, et al.[302]         | 2013             | Contemporary and optimal medical management of peripheral arterial disease                                                                                                                                      | Study participants were not T2DM patients  |
| 340     | M. Tepel, et al.[303]                 | 2003             | The antioxidant acetylcysteine reduces cardiovascular events in patients with end-stage renal failure: a randomized, controlled trial                                                                           | Study participants were not T2DM patients  |
| 341     | W. J. Tietge, et al.[304]             | 2012             | Early mitral valve repair versus watchful waiting in patients with severe asymptomatic organic mitral regurgitation; rationale and design of the Dutch AMR trial, a multicenter, randomised trial               | Study participants were not T2DM patients  |
| 342     | J. Timsit and D. Dubois-Laforgue[305] | 2000             | [Should the occurrence of a first coronary event change the management of diabetes?]                                                                                                                            | Cardiovascular mortality is not an outcome |
| 343     | Å. Tivesten, et al.[306]              | 2015             | Cardiovascular risk with androgen deprivation therapy for prostate cancer: Potential mechanisms                                                                                                                 | Study participants were not T2DM patients  |
| 344     | I. Tkáč[307]                          | 2009             | Effect of intensive glycemic control on cardiovascular outcomes and all-cause mortality in type 2 diabetes: Overview and metaanalysis of five trials                                                            | Study design is not RCT                    |
| 345     | D. Tousoulis, et al.[308]             | 2014             | Diabetes mellitus and heart failure                                                                                                                                                                             | Study design is not RCT                    |
| 346     | Z. Trifunovic, et al.[309]            | 2015             | Functional recovery of patients with ischemic cardiomyopathy treated with coronary artery bypass surgery and concomitant intramyocardial bone marrow mononuclear cell implantation--a long-term follow-up study | Study participants were not T2DM patients  |

| Study # | Author                                           | Publication year | Title                                                                                                                                                                                                               | Reason for exclusion                      |
|---------|--------------------------------------------------|------------------|---------------------------------------------------------------------------------------------------------------------------------------------------------------------------------------------------------------------|-------------------------------------------|
| 347     | W. C. Tsai, et al.[310]                          | 2012             | Chewing areca nut increases the risk of coronary artery disease in Taiwanese men: a case-control study                                                                                                              | Study participants were not T2DM patients |
| 348     | G. M. Tsang, et al.[311]                         | 1994             | Pharmacological reduction of the systemically damaging effects of local ischaemia                                                                                                                                   | Study participants were not T2DM patients |
| 349     | V. Tsimihodimos, et al.[312]                     | 2013             | Summarizing the FIELD study: Lessons from a 'negative' trial                                                                                                                                                        | Intervention group is not OHA             |
| 352     | T. Unger and M. Stoppelhaar[313]                 | 2007             | Rationale for Double Renin-Angiotensin-Aldosterone System Blockade                                                                                                                                                  | Intervention group is not OHA             |
| 353     | I. C. C. van der Horst and M. W. N. Nijsten[314] | 2015             | Metformin in cardiac surgery: High expectations                                                                                                                                                                     | Study participants were not T2DM patients |
| 354     | A. Vanasse, et al.[315]                          | 2009             | Stroke and cardiovascular morbidity and mortality associated with rosiglitazone use in elderly diabetic patients                                                                                                    | Study design is not RCT                   |
| 355     | L. Vanhees, et al.[316]                          | 2012             | Importance of characteristics and modalities of physical activity and exercise in the management of cardiovascular health in individuals with cardiovascular risk factors: Recommendations from the EACPR (Part II) | Intervention group is not OHA             |
| 356     | R. Vanholder, et al.[317]                        | 2016             | Clinical management of the uraemic syndrome in chronic kidney disease                                                                                                                                               | Study participants were not T2DM patients |
| 357     | C. Varenhorst, et al.[318]                       | 2014             | Causes of mortality with ticagrelor compared with clopidogrel in acute coronary syndromes                                                                                                                           | Study participants were not T2DM patients |
| 358     | C. Varenhorst, et al.[319]                       | 2012             | Factors contributing to the lower mortality with ticagrelor compared with clopidogrel in patients undergoing coronary artery bypass surgery                                                                         | Study participants were not T2DM patients |
| 359     | D. Varvaki Rados, et al.[320]                    | 2016             | The Association between Sulfonylurea Use and All-Cause and Cardiovascular Mortality: A Meta-Analysis with Trial Sequential Analysis of Randomized Clinical Trials                                                   | Study design is not RCT                   |
| 360     | S. Verma, et al.[321]                            | 2011             | Plasma renin activity predicts cardiovascular mortality in the Heart Outcomes Prevention Evaluation (HOPE) study                                                                                                    | Study participants were not T2DM patients |
| 361     | R. D. Vieira, et al.[322]                        | 2012             | Effect of complete revascularization on 10-year survival of patients with stable multivessel coronary artery disease: MASS II trial                                                                                 | Study participants were not T2DM patients |
| 362     | O. Vonend, et al.[323]                           | 2015             | [Renal denervation in refractory hypertension: joint statement of the German hypertension league DHL eV and the German societies of cardiology, angiology, nephrology and radiology]                                | Study participants were not T2DM patients |
| 363     | M. T. Wade and J. P. Rindone[324]                | 2013             | Myths in the treatment of type 2 diabetes: An alternative viewpoint based on randomized controlled trials                                                                                                           | Study design is not RCT                   |
| 364     | L. W. Wang, et al.[325]                          | 2015             | Prognostic value of cardiac tests in potential kidney transplant recipients: a systematic review                                                                                                                    | Study participants were not T2DM patients |

| Study # | Author                           | Publication year | Title                                                                                                                                                                                                                                                                                                                  | Reason for exclusion                       |
|---------|----------------------------------|------------------|------------------------------------------------------------------------------------------------------------------------------------------------------------------------------------------------------------------------------------------------------------------------------------------------------------------------|--------------------------------------------|
| 365     | M. Wang, et al.[326]             | 2014             | Long-term exposure to elemental constituents of particulate matter and cardiovascular mortality in 19 European cohorts: results from the ESCAPE and TRANSPHORM projects                                                                                                                                                | Intervention group is not OHA              |
| 366     | J. Werzowa, et al.[327]          | 2015             | Antidiabetic therapy in post kidney transplantation diabetes mellitus                                                                                                                                                                                                                                                  | Study design is not RCT                    |
| 367     | C. M. White, et al.[328]         | 2010             | Benefits and risks associated with beta-blocker prophylaxis in noncardiac surgery                                                                                                                                                                                                                                      | Study participants were not T2DM patients  |
| 368     | W. B. White, et al.[329]         | 2016             | Angiotensin-converting enzyme inhibitor use and major cardiovascular outcomes in type 2 diabetes mellitus treated with the dipeptidyl peptidase 4 inhibitor alogliptin                                                                                                                                                 | Intervention group is not OHA              |
| 369     | F. Wiesbauer, et al.[330]        | 2007             | Perioperative beta-blockers for preventing surgery-related mortality and morbidity: a systematic review and meta-analysis                                                                                                                                                                                              | Study participants were not T2DM patients  |
| 370     | D. N. Wijeyesundera, et al.[331] | 2014             | Perioperative beta blockade in noncardiac surgery: a systematic review for the 2014 ACC/AHA guideline on perioperative cardiovascular evaluation and management of patients undergoing noncardiac surgery: a report of the American College of Cardiology/American Heart Association Task Force on practice guidelines | Study participants were not T2DM patients  |
| 371     | C. J. Woelk[332]                 | 2012             | Management of critical limb ischemia                                                                                                                                                                                                                                                                                   | Study participants were not T2DM patients  |
| 372     | C. C. Wong, et al.[333]          | 1997             | Influence of gender on cardiovascular mortality in acute myocardial infarction patients with high indication for coronary angiography                                                                                                                                                                                  | Study participants were not T2DM patients  |
| 373     | P. F. Wong, et al.[334]          | 2011             | Antiplatelet agents for intermittent claudication                                                                                                                                                                                                                                                                      | Study participants were not T2DM patients  |
| 374     | N. Wongcharoenkiat, et al.[335]  | 2012             | A comparison of outcomes between percutaneous coronary intervention versus coronary artery bypass surgery in octogenarian patients                                                                                                                                                                                     | Study participants were not T2DM patients  |
| 375     | S. Wu, et al.[336]               | 2014             | Dipeptidyl peptidase-4 inhibitors and cardiovascular outcomes: Meta-analysis of randomized clinical trials with 55,141 participants                                                                                                                                                                                    | Study design is not RCT                    |
| 376     | B. Yanagawa, et al.[337]         | 2016             | A systematic review and meta-analysis of in situ versus composite bilateral internal thoracic artery grafting                                                                                                                                                                                                          | Intervention group is not OHA              |
| 377     | M. S. Yee, et al.[338]           | 2010             | Treatment The effects of rosiglitazone on atherosclerotic progression in patients with Type 2 diabetes at high cardiovascular risk                                                                                                                                                                                     | Cardiovascular mortality is not an outcome |
| 378     | H. Yokoyama, et al.[339]         | 2007             | Miglitol increases the adiponectin level and decreases urinary albumin excretion in patients with type 2 diabetes mellitus                                                                                                                                                                                             | Cardiovascular mortality is not an outcome |

| <b>Study #</b> | <b>Author</b>           | <b>Publication year</b> | <b>Title</b>                                                                                                                                                                                                                                                                                                 | <b>Reason for exclusion</b>                               |
|----------------|-------------------------|-------------------------|--------------------------------------------------------------------------------------------------------------------------------------------------------------------------------------------------------------------------------------------------------------------------------------------------------------|-----------------------------------------------------------|
| 379            | H. Yoshii, et al.[340]  | 2014                    | Effects of pioglitazone on macrovascular events in patients with type 2 diabetes mellitus at high risk of stroke: The profit-J study                                                                                                                                                                         | Cardiovascular mortality is not an outcome                |
| 380            | S. Yusuf, et al.[341]   | 2005                    | Effects of candesartan on the development of a new diagnosis of diabetes mellitus in patients with heart failure                                                                                                                                                                                             | Cardiovascular mortality is not an outcome                |
| 381            | M. Zaugg, et al.[342]   | 2007                    | Adrenergic receptor genotype but not perioperative bisoprolol therapy may determine cardiovascular outcome in at-risk patients undergoing surgery with spinal block: the Swiss Beta Blocker in Spinal Anesthesia (BBSA) study: a double-blinded, placebo-controlled, multicenter trial with 1-year follow-up | Study participants were not T2DM patients                 |
| 384            | Y. Zhang, et al.[343]   | 2014                    | Lipid profiling reveals different therapeutic effects of metformin and glipizide in patients with type 2 diabetes and coronary artery disease                                                                                                                                                                | Intervention group is not OHA                             |
| 385            | F. Zhao, et al.[344]    | 2017                    | The influence of mortality rate from membrane flux for end-stage renal disease: A meta-analysis                                                                                                                                                                                                              | Study participants were not T2DM patients                 |
| 386            | B. Zinman, et al.[345]  | 2014                    | Rationale, design, and baseline characteristics of a randomized, placebo-controlled cardiovascular outcome trial of empagliflozin (EMPA-REG OUTCOME™)                                                                                                                                                        | Study design is not RCT. It was the protocol of the study |
| 389            | A. Zuccala, et al.[346] | 2000                    | 3 R study: renal outcome in renal ischemia: revascularisation or medical treatment                                                                                                                                                                                                                           | Study participants were not T2DM patients                 |



**eTable 2. Risk of Bias Assessment**

| Author                | Year | Random Sequence Generation | Allocation Concealment | Blinding of Participants and Personnel | Blinding of outcome assessment | Incomplete outcome data | Selective reporting | <b>Overall RoB</b> |
|-----------------------|------|----------------------------|------------------------|----------------------------------------|--------------------------------|-------------------------|---------------------|--------------------|
| W. Doehner, et al.    | 2012 | low                        | low                    | unclear                                | unclear                        | high                    | high                | high               |
| T. D. Giles, et al.   | 2010 | low                        | low                    | unclear                                | unclear                        | low                     | low                 | high               |
| T. D. Giles, et al.   | 2008 | high                       | low                    | unclear                                | unclear                        | low                     | low                 | high               |
| J. Hong, et al.       | 2013 | low                        | low                    | low                                    | low                            | low                     | low                 | low                |
| B. M. Scirica, et al. | 2013 | low                        | low                    | unclear                                | unclear                        | high                    | low                 | high               |
| R. Turner             | 1998 | low                        | low                    | high                                   | high                           | high                    | high                | high               |
| B. Zinman, et al.     | 2015 | low                        | high                   | high                                   | high                           | high                    | low                 | high               |
| B. Gallwitz, et al.   | 2012 | low                        | low                    | low                                    | unclear                        | low                     | unclear             | low                |
| J. B. Green, et al.   | 2015 | low                        | low                    | low                                    | low                            | high                    | low                 | high               |
| P. D. Home, et al.    | 2009 | low                        | high                   | high                                   | high                           | high                    | high                | high               |

## eFigure 1. Sample Search Strategy Using PubMed

### Search Details

|                                                                                                                                                                                                                                                                                                                                                                                                                                                                                                                                                                        |                                                             |                                                  |          |                                                             |
|------------------------------------------------------------------------------------------------------------------------------------------------------------------------------------------------------------------------------------------------------------------------------------------------------------------------------------------------------------------------------------------------------------------------------------------------------------------------------------------------------------------------------------------------------------------------|-------------------------------------------------------------|--------------------------------------------------|----------|-------------------------------------------------------------|
| <b>Query Translation:</b>                                                                                                                                                                                                                                                                                                                                                                                                                                                                                                                                              |                                                             |                                                  |          |                                                             |
| <pre>"diabetes mellitus"[All Fields] OR t2dm[All Fields] OR "type 2 diabetes mellitus"[All Fields] OR (diabet[All Fields] OR diabeta[All Fields] OR diabet'[All Fields] OR diabetacorum[All Fields] OR diabetaction[All Fields] OR diabetaeta[All Fields] OR diabetagenic[All Fields] OR diabetalogicznej[All Fields] OR diabetas[All Fields] OR diabetassotsirovannykh[All Fields] OR diabetc[All Fields] OR diabetci[All Fields] OR diabetcieza[All Fields] OR diabetcs[All Fields] OR diabete[All Fields] OR diabete's[All Fields] OR diabetea[All Fields] OR</pre> |                                                             |                                                  |          |                                                             |
| <input type="button" value="Search"/> <input type="button" value="URL"/>                                                                                                                                                                                                                                                                                                                                                                                                                                                                                               |                                                             |                                                  |          |                                                             |
| <b>Result:</b>                                                                                                                                                                                                                                                                                                                                                                                                                                                                                                                                                         |                                                             |                                                  |          |                                                             |
| <a href="#">3</a>                                                                                                                                                                                                                                                                                                                                                                                                                                                                                                                                                      |                                                             |                                                  |          |                                                             |
| <b>Translations:</b>                                                                                                                                                                                                                                                                                                                                                                                                                                                                                                                                                   |                                                             |                                                  |          |                                                             |
|                                                                                                                                                                                                                                                                                                                                                                                                                                                                                                                                                                        |                                                             |                                                  |          |                                                             |
| <table border="1"><tr><td>acarbose</td><td>"acarbose"[MeSH Terms] OR "acarbose"[All Fields]</td></tr><tr><td>miglitol</td><td>"miglitol"[Supplementary Concept] OR "miglitol"[All Fields]</td></tr></table>                                                                                                                                                                                                                                                                                                                                                            | acarbose                                                    | "acarbose"[MeSH Terms] OR "acarbose"[All Fields] | miglitol | "miglitol"[Supplementary Concept] OR "miglitol"[All Fields] |
| acarbose                                                                                                                                                                                                                                                                                                                                                                                                                                                                                                                                                               | "acarbose"[MeSH Terms] OR "acarbose"[All Fields]            |                                                  |          |                                                             |
| miglitol                                                                                                                                                                                                                                                                                                                                                                                                                                                                                                                                                               | "miglitol"[Supplementary Concept] OR "miglitol"[All Fields] |                                                  |          |                                                             |
| <b>Database:</b>                                                                                                                                                                                                                                                                                                                                                                                                                                                                                                                                                       |                                                             |                                                  |          |                                                             |
| PubMed                                                                                                                                                                                                                                                                                                                                                                                                                                                                                                                                                                 |                                                             |                                                  |          |                                                             |
| <b>User query:</b>                                                                                                                                                                                                                                                                                                                                                                                                                                                                                                                                                     |                                                             |                                                  |          |                                                             |
| "diabetes mellitus" OR t2dm OR "type 2 diabetes mellitus" OR diabet* AND "Alpha-glucosidase Inhibitors" OR acarbose OR miglitol AND "cardiovascular mortality" AND random*                                                                                                                                                                                                                                                                                                                                                                                             |                                                             |                                                  |          |                                                             |

**eFigure 2. Forest plot from the random-effects model for reduction in HbA1c and oral anti-diabetic drugs, comparing those were approved before and after the 2008 FDA guidance for industry**

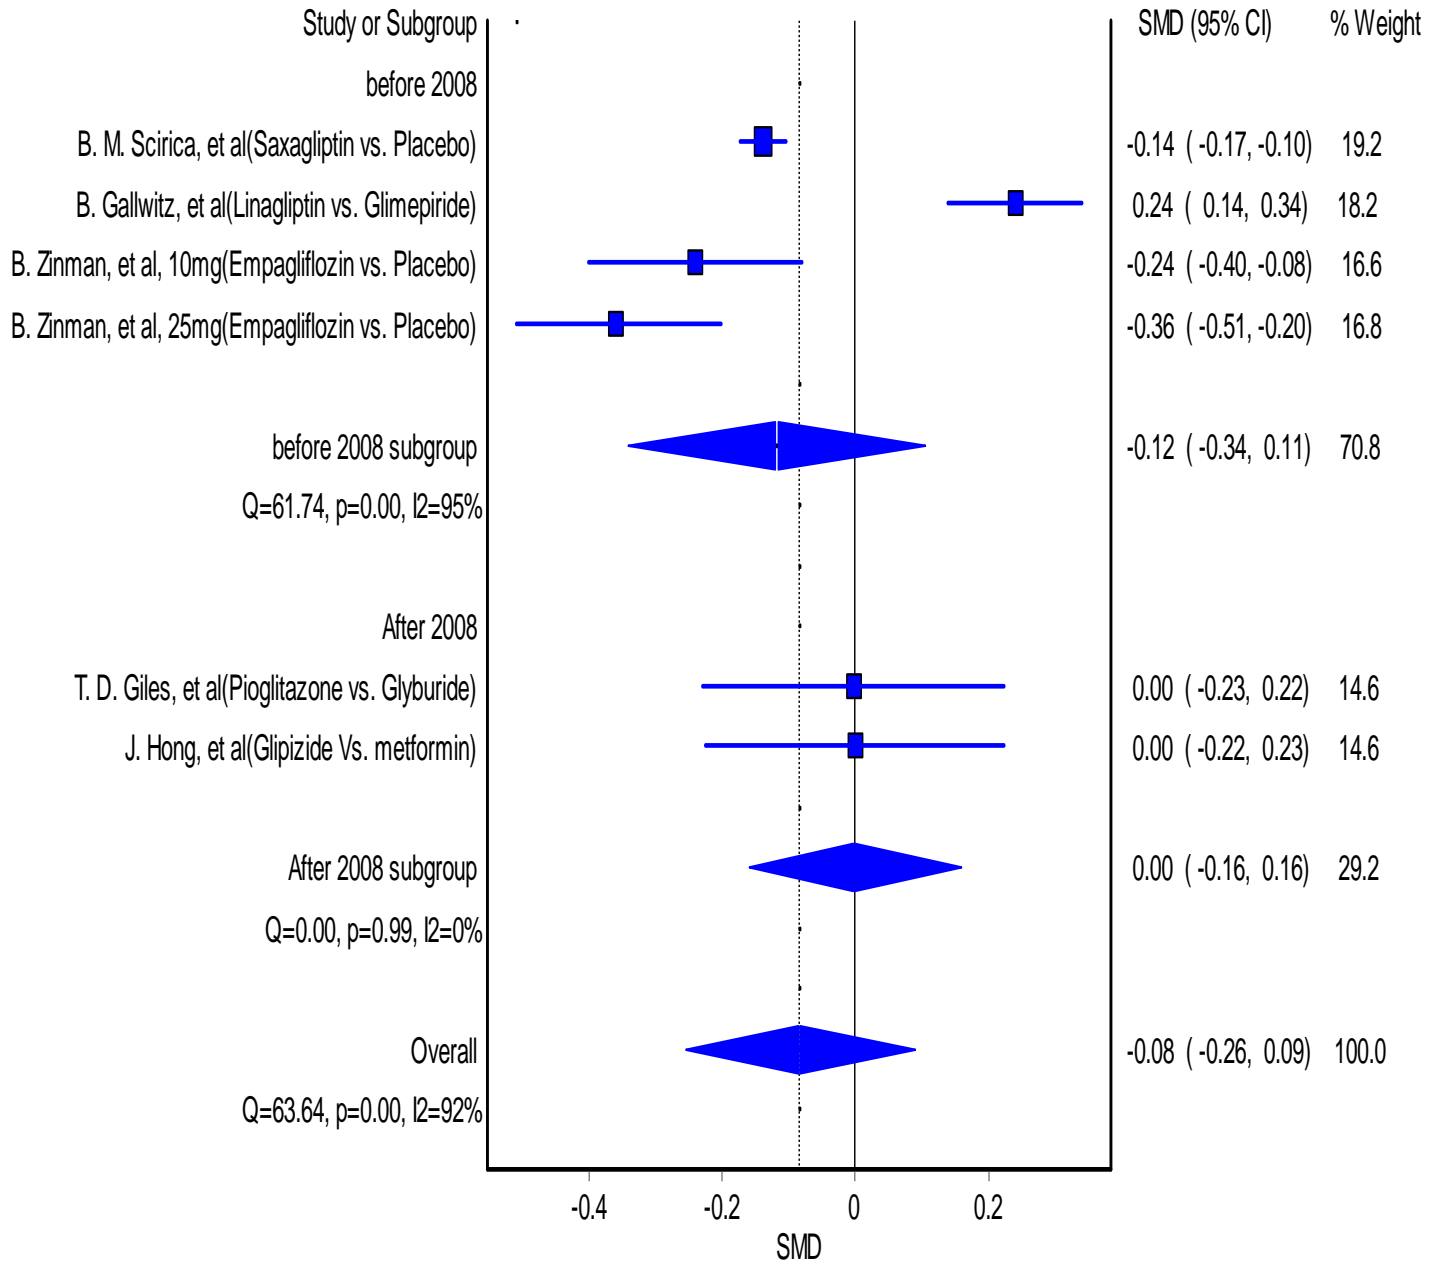

B. Zinman, et al 10mg and B. Zainman, et al 25 mg is one study where cardiovascular safety of two different strengths (10 mg and 25 mg) of empagliflozin were accessed.

**eFigure 3. Funnel plot for association between oral anti-diabetic drugs and HbA1c reduction**

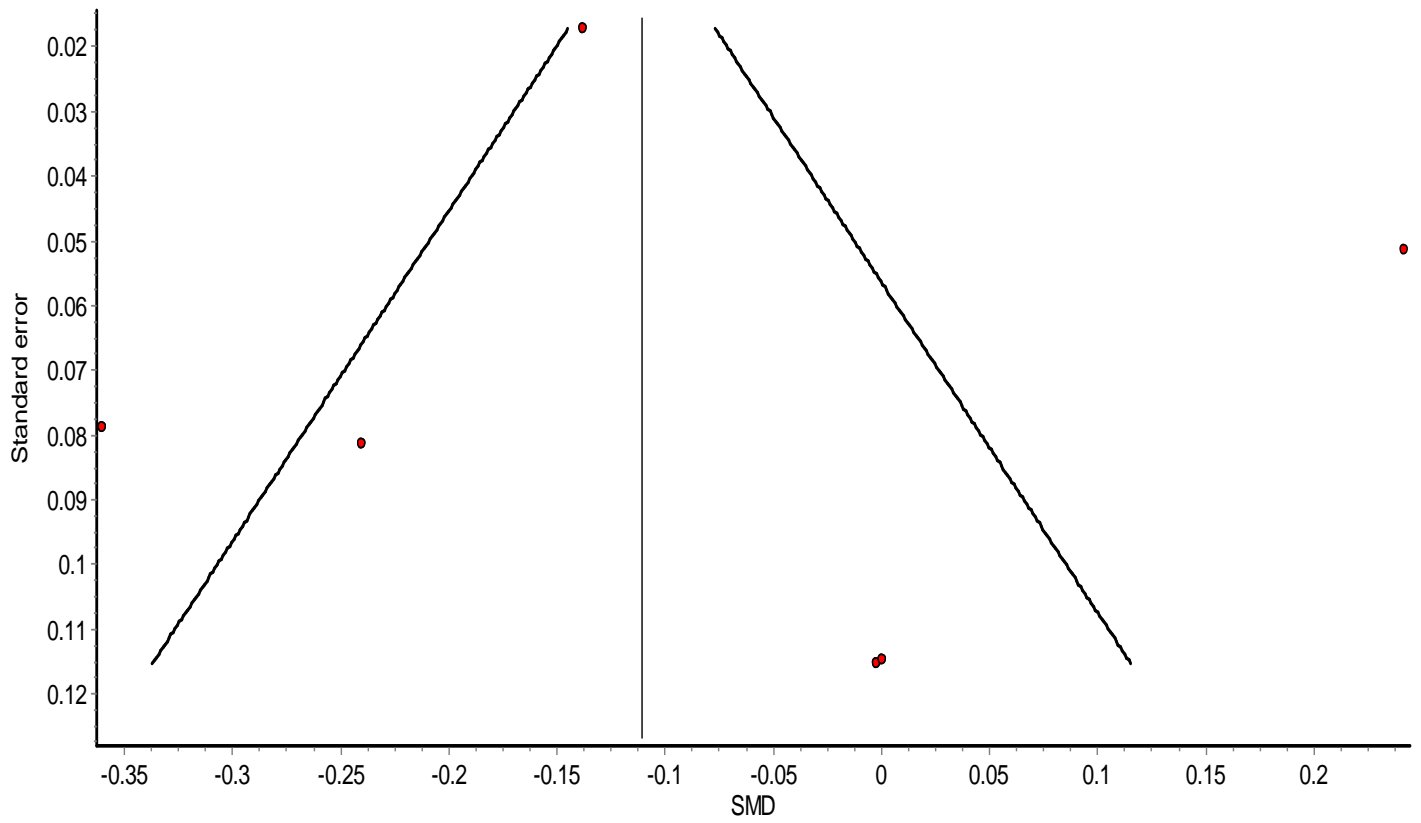

**eFigure 4. Forest plot from the random-effects model for reduction in HbA1c and oral anti-diabetic drugs, comparing different pharmacological drug classes**

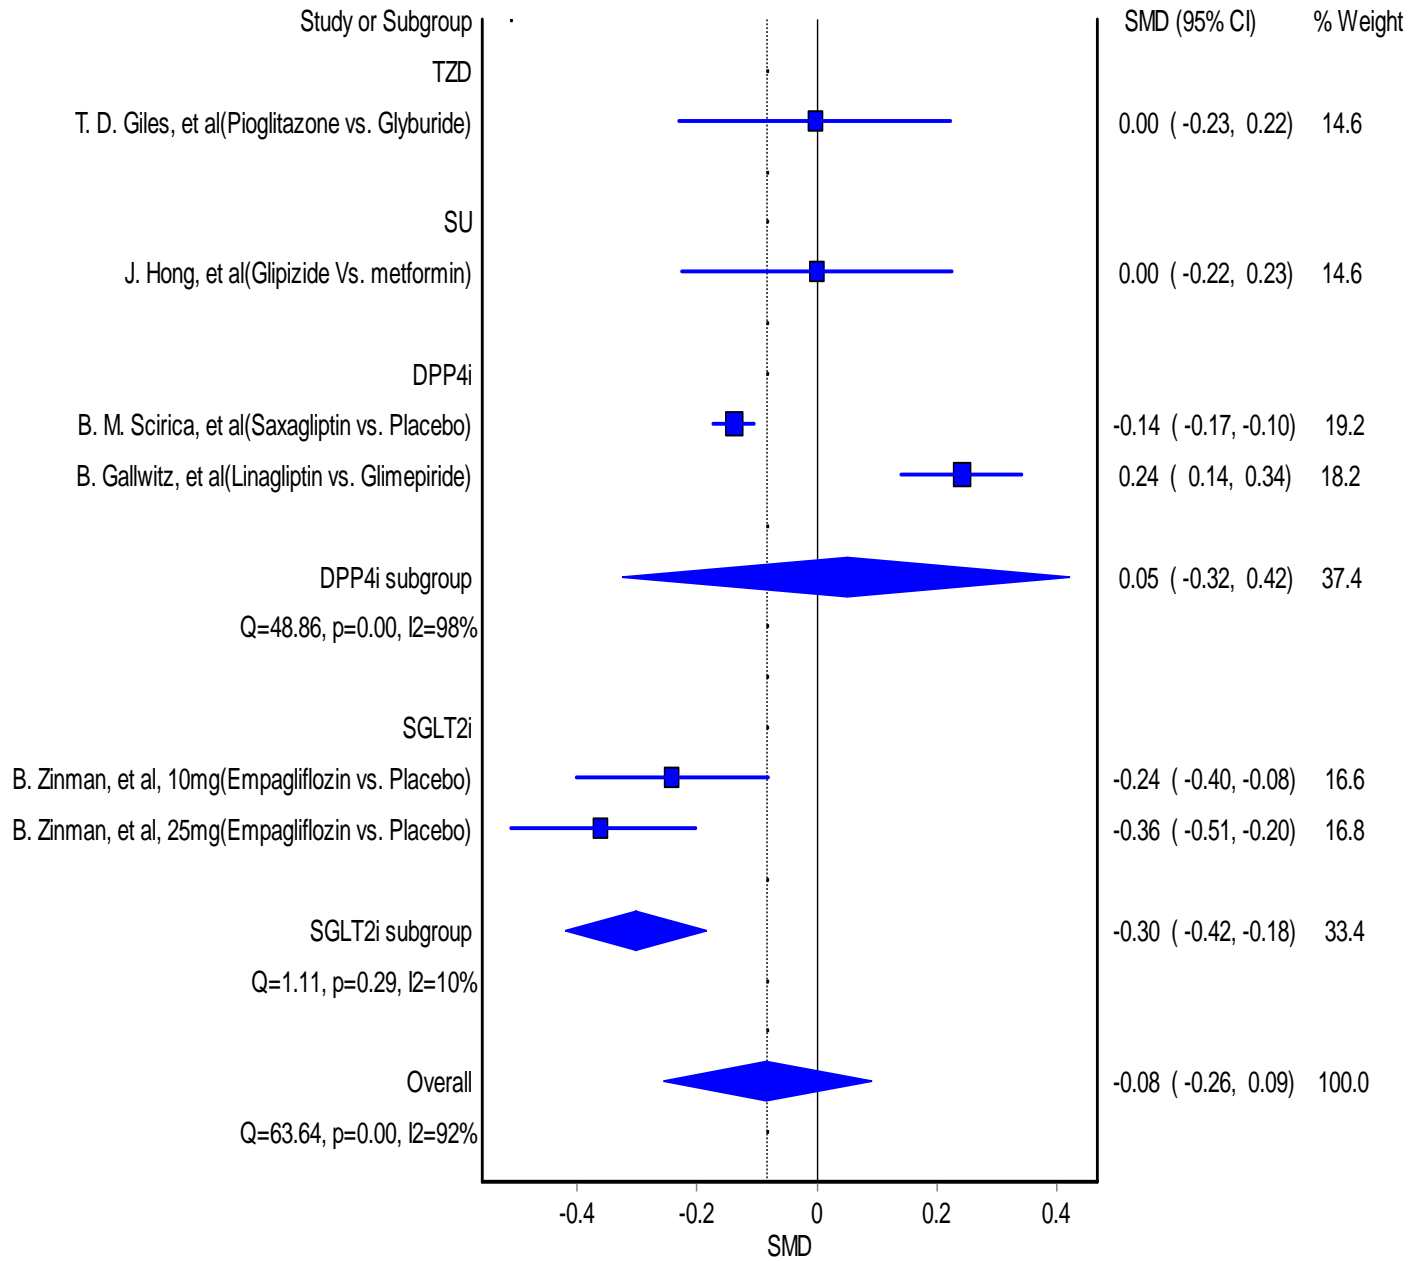

B. Zinman, et al 10mg and B. Zainman, et al 25 mg is one study where cardiovascular safety of two different strengths (10 mg and 25 mg) of empagliflozin were accessed

**eFigure 5. Forest plot from the random-effects model for impact of oral hypoglycemic agent on cardiovascular mortality by comparator group**

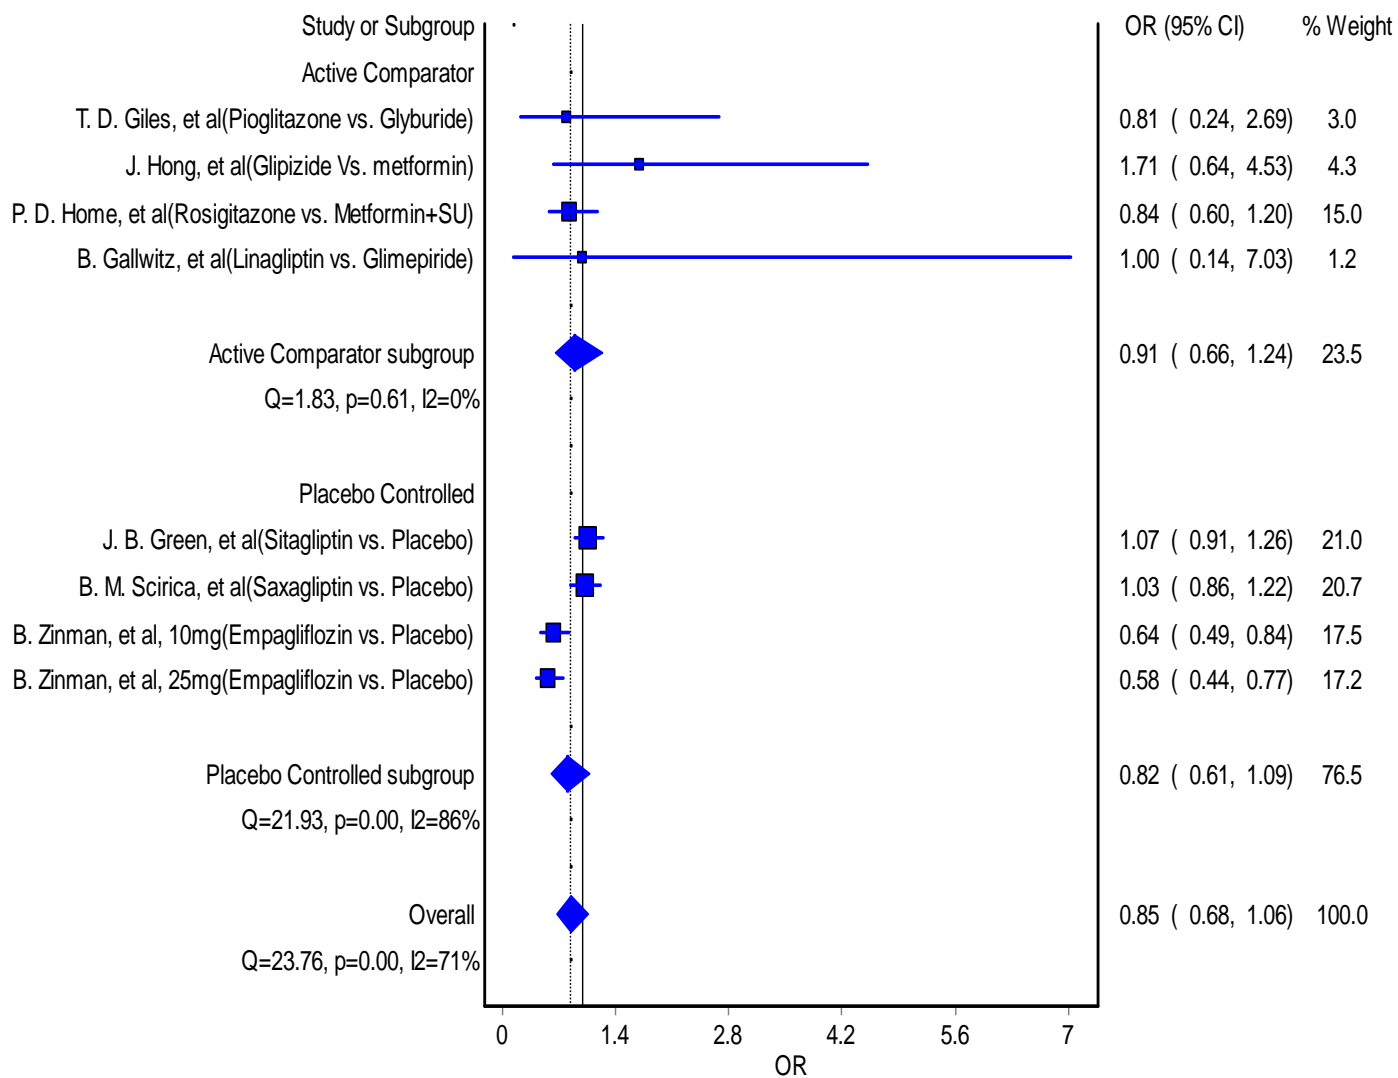

B. Zinman, et al 10mg and B. Zainman, et al 25 mg is one study where cardiovascular safety of two different strengths (10 mg and 25 mg) of empagliflozin were accessed

**eFigure 6. Pooled risk of bias results using the Cochrane risk of Bias Assessment Instrument**

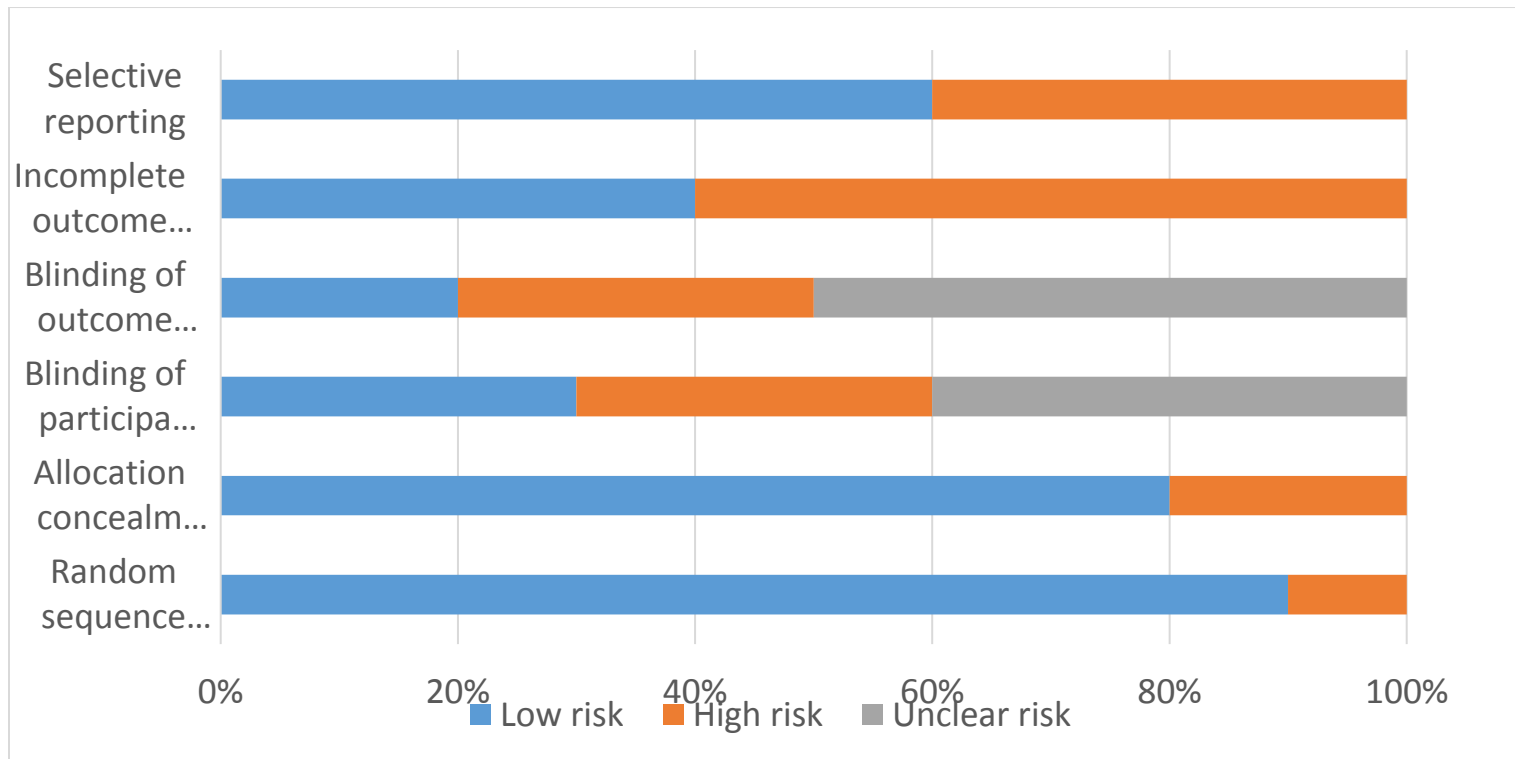

## Reference

1. *Biventricular pacing (cardiac resynchronization therapy): an evidence-based analysis*. Ont Health Technol Assess Ser, 2005. **5**(13): p. 1-60.
2. *HbA1c targets in type 2 diabetes: Guidelines and evidence*. Drug and Therapeutics Bulletin, 2013. **51**(4): p. 42-45.
3. *Hypoglycaemic therapy in type 2 diabetes. Part I. Metformin is the only glucose-lowering drug known to prevent complications of diabetes*. Prescrire Int, 2015. **24**(159): p. 103-6.
4. Piva, S.R., et al., *Links between Osteoarthritis and Diabetes: Implications for Management from a Physical Activity Perspective*. Clinics in geriatric medicine, 2015. **31**(1): p. 67-87.
5. *Glucose-lowering treatment of type 2 diabetes: Part II - glucose-lowering drugs after metformin: A choice based largely on adverse effects*. Prescrire International, 2015. **24**(160): p. 130-135.
6. *Empagliflozin (Jardiance). Type 2 diabetes: no rush to use this drug*. Prescrire Int, 2016. **25**(172): p. 145-8.
7. Abdelmoneim, A.S., et al., *Cardiovascular safety of sulphonylureas: Over 40years of continuous controversy without an answer*. Diabetes, Obesity and Metabolism, 2015. **17**(6): p. 523.
8. Abdel-Wahab, M., et al., *Comparison of balloon-expandable vs self-expandable valves in patients undergoing transcatheter aortic valve replacement: the CHOICE randomized clinical trial*. Jama, 2014. **311**(15): p. 1503-14.
9. Abraira, C., et al., *Cardiovascular events and correlates in the Veterans Affairs Diabetes Feasibility Trial. Veterans Affairs Cooperative Study on Glycemic Control and Complications in Type II Diabetes*. Arch Intern Med, 1997. **157**(2): p. 181-8.
10. Agarwal, S., A. Parashar, and V. Menon, *Meta-analysis of the cardiovascular outcomes with dipeptidyl peptidase 4 inhibitors: Validation of the current FDA mandate*. American Journal of Cardiovascular Drugs, 2014. **14**(3): p. 191-207.
11. Akdag, S., et al., *The effect of low-sodium dialysate on ambulatory blood pressure measurement parameters in patients undergoing hemodialysis*. Ther Clin Risk Manag, 2015. **11**: p. 1829-35.
12. Alahdab, F., et al., *A systematic review for the screening for peripheral arterial disease in asymptomatic patients*. J Vasc Surg, 2015. **61**(3 Suppl): p. 42s-53s.
13. Aline Roth, P.W. and F.R. Jornayvaz, *[Cardiovascular safety of antidiabetics]*. Rev Med Suisse, 2016. **12**(521): p. 1084, 1086-8.
14. Al-Khatib, S.M., et al., *AHRQ Comparative Effectiveness Reviews, in Treatment of Atrial Fibrillation*. 2013, Agency for Healthcare Research and Quality (US): Rockville (MD).
15. Al-Omran, M. and T.F. Lindsay, *Should all patients with peripheral arterial disease be treated with an angiotensin-converting enzyme inhibitor?* Can J Cardiol, 2005. **21**(2): p. 189-93.
16. Anderson, J., et al., *Does metformin improve vascular health in children with type 1 diabetes? Protocol for a one year, double blind, randomised, placebo controlled trial*. BMC Pediatr, 2013. **13**: p. 108.
17. Ando, T., et al., *Transcatheter aortic valve replacement versus surgical aortic valve replacement in patients with previous coronary artery bypass surgery: A systematic review and meta-analysis*. Int J Cardiol, 2016. **215**: p. 14-9.
18. Ando, T. and H. Takagi, *The Prognostic Impact of New-Onset Persistent Left Bundle Branch Block Following Transcatheter Aortic Valve Implantation: A Meta-analysis*. Clin Cardiol, 2016. **39**(9): p. 544-50.
19. Andrews, R.C. and M.Z. Chen, *Bariatric surgery for type 2 diabetes always produces a good outcome*. Practical Diabetes, 2014. **31**(9): p. 376-380.
20. Angeli, F., et al., *ss-Blockers reduce mortality in patients undergoing high-risk non-cardiac surgery*. Am J Cardiovasc Drugs, 2010. **10**(4): p. 247-59.
21. Antoniou, G.A., et al., *Statin therapy in lower limb peripheral arterial disease: Systematic review and meta-analysis*. Vascul Pharmacol, 2014. **63**(2): p. 79-87.
22. Antoniou, G.A., et al., *Meta-analysis of the effects of statins on perioperative outcomes in vascular and endovascular surgery*. J Vasc Surg, 2015. **61**(2): p. 519-532.e1.



23. Aro, J., *Cardiovascular and all-cause mortality in prostatic cancer patients treated with estrogens or orchiectomy as compared to the standard population*. Prostate, 1991. **18**(2): p. 131-7.
24. Aro, J.L., et al., *High dose polyoestradiol phosphate with and without acetosalicylic acid versus orchiectomy in the treatment of prostatic cancer. Finnprostate Group*. Br J Urol, 1989. **63**(5): p. 512-4.
25. Aronson, D. and E.R. Edelman, *Coronary artery disease and diabetes mellitus*. Cardiology Clinics, 2014. **32**(3): p. 439-455.
26. Arsenault, K.A., et al., *Interventions for preventing post-operative atrial fibrillation in patients undergoing heart surgery*. Cochrane Database Syst Rev, 2013(1): p. Cd003611.
27. Åsvold, B.O., M. Jonsbu, and V. Grill, *Sulphonylurea and cardiovascular risk*. Tidsskrift for den Norske Laegeforening, 2000. **120**(21): p. 2560-2564.
28. Avgerinos, E.D. and R.A. Chaer, *Catheter-directed interventions for acute pulmonary embolism*. J Vasc Surg, 2015. **61**(2): p. 559-65.
29. Azim, S., W.L. Baker, and W.B. White, *Evaluating Cardiovascular Safety of Novel Therapeutic Agents for the Treatment of Type 2 Diabetes Mellitus*. Current Cardiology Reports, 2014. **16**(11): p. 1-13.
30. Bajuk Studen, K., M. Jensterle Sever, and M. Pfeifer, *Cardiovascular risk and subclinical cardiovascular disease in polycystic ovary syndrome*, in *Frontiers of Hormone Research*. 2013. p. 64-82.
31. Balk, E.M., et al., *AHRQ Comparative Effectiveness Reviews*, in *Renal Artery Stenosis Management Strategies: An Updated Comparative Effectiveness Review*. 2016, Agency for Healthcare Research and Quality (US): Rockville (MD).
32. Bangalore, S., et al., *Perioperative beta blockers in patients having non-cardiac surgery: a meta-analysis*. Lancet, 2008. **372**(9654): p. 1962-76.
33. Barbanti, M., et al., *Three-Year Outcomes of Transcatheter Aortic Valve Implantation in Patients With Varying Levels of Surgical Risk (from the CoreValve ADVANCE Study)*. Am J Cardiol, 2016. **117**(5): p. 820-7.
34. Barkagan, M., et al., *Impact of routine manual aspiration thrombectomy on outcomes of patients undergoing primary percutaneous coronary intervention for acute myocardial infarction: A meta-analysis*. Int J Cardiol, 2016. **204**: p. 189-95.
35. Barreto, F.C., et al., *Effects of pyrophosphate delivery in a peritoneal dialysis solution on bone tissue of apolipoprotein-E knockout mice with chronic kidney disease*. J Bone Miner Metab, 2014. **32**(6): p. 636-44.
36. Baumbach, A., et al., *Safety and performance of a novel embolic deflection device in patients undergoing transcatheter aortic valve replacement: results from the DEFLECT I study*. EuroIntervention, 2015. **11**(1): p. 75-84.
37. Belcher, G., et al., *Cardiovascular effects of treatment of type 2 diabetes with pioglitazone, metformin and gliclazide*. Int J Clin Pract, 2004. **58**(9): p. 833-7.
38. Berwanger, O., et al., *Association between pre-operative statin use and major cardiovascular complications among patients undergoing non-cardiac surgery: the VISION study*. Eur Heart J, 2016. **37**(2): p. 177-85.
39. Bittner, V., et al., *Comprehensive cardiovascular risk factor control improves survival: The BARI 2D trial*. Journal of the American College of Cardiology, 2015. **66**(7): p. 765-773.
40. Blair, J.E., et al., *Continental differences in clinical characteristics, management, and outcomes in patients hospitalized with worsening heart failure results from the EVEREST (Efficacy of Vasopressin Antagonism in Heart Failure: Outcome Study with Tolvaptan) program*. J Am Coll Cardiol, 2008. **52**(20): p. 1640-8.
41. Bolen, S., et al., *AHRQ Comparative Effectiveness Reviews*, in *Diabetes Medications for Adults With Type 2 Diabetes: An Update*. 2016, Agency for Healthcare Research and Quality (US): Rockville (MD).
42. Bouchardy, C., et al., *Excess of cardiovascular mortality among node-negative breast cancer patients irradiated for inner-quadrant tumors*. Ann Oncol, 2010. **21**(3): p. 459-65.
43. Boussageon, R., F. Gueyffier, and C. Cornu, *Effects of pharmacological treatments on micro- and macrovascular complications of type 2 diabetes: What is the level of evidence?* Diabetes and Metabolism, 2014. **40**(3): p. 169-175.

44. Brecker, S.J., et al., *Impact of Anesthesia Type on Outcomes of Transcatheter Aortic Valve Implantation (from the Multicenter ADVANCE Study)*. Am J Cardiol, 2016. **117**(8): p. 1332-8.
45. Bridges, C.R., *Cardiac surgery in African Americans*. Ann Thorac Surg, 2003. **76**(4): p. S1356-62.
46. Bromage, D.I. and D.M. Yellon, *The pleiotropic effects of metformin: Time for prospective studies*. Cardiovascular Diabetology, 2015. **14**(1).
47. Brown, L.C., et al., *Incidence of cardiovascular events and death after open or endovascular repair of abdominal aortic aneurysm in the randomized EVAR trial 1*. Br J Surg, 2011. **98**(7): p. 935-42.
48. Buhse, S., I. Mühlhauser, and M. Lenz, *The 'Old' anti-diabetic agents: A systematic inventory*, in *Endocrine Development*. 2016. p. 28-42.
49. Burgmaier, M., C. Heinrich, and N. Marx, *Cardiovascular effects of GLP-1 and GLP-1-based therapies: Implications for the cardiovascular continuum in diabetes?* Diabetic Medicine, 2013. **30**(3): p. 289-299.
50. Calkin, C.V., et al., *The relationship between bipolar disorder and type 2 diabetes: More than just co-morbid disorders*. Annals of Medicine, 2013. **45**(2): p. 171-181.
51. Cao, K., et al., *Association of an inter-arm systolic blood pressure difference with all-cause and cardiovascular mortality: An updated meta-analysis of cohort studies*. Int J Cardiol, 2015. **189**: p. 211-9.
52. Carty, D.M., R. Drummond, and M. Fisher, *Cardiovascular safety and GLP-1 receptor agonists*. Practical Diabetes, 2013. **30**(6): p. 242-245.
53. Carty, D.M., R. Drummond, and M. Fisher, *Cardiovascular safety and DPP-4 inhibitors*. Practical Diabetes, 2013. **30**(2): p. 78-81.
54. Chan, Y.C., S.W. Cheng, and M.G. Irwin, *Perioperative use of statins in noncardiac surgery*. Vasc Health Risk Manag, 2008. **4**(1): p. 75-81.
55. Chen, L., et al., *Long-term mortality after parathyroidectomy among chronic kidney disease patients with secondary hyperparathyroidism: a systematic review and meta-analysis*. Ren Fail, 2016. **38**(7): p. 1050-8.
56. Cohen, N.D., et al., *The rationale for combining GLP-1 receptor agonists with basal insulin*. Medical Journal of Australia, 2013. **199**(4): p. 246-249.
57. Coluzzi, G., E.P. Navarese, and F. Andreotti, *EuroThrombosis: Annual meeting of the European Society of Cardiology Working Group on Thrombosis*. Expert Review of Hematology, 2012. **5**(1): p. 39-42.
58. Conte, J.V., et al., *Transcatheter or Surgical Aortic Valve Replacement in Patients With Prior Coronary Artery Bypass Grafting*. Ann Thorac Surg, 2016. **101**(1): p. 72-9; discussion 79.
59. Corathers, S.D., S. Peavie, and M. Salehi, *Complications of Diabetes Therapy*. Endocrinology and Metabolism Clinics of North America, 2013. **42**(4): p. 947-970.
60. Cruz U, R. and L.M. Letelier S, *Critically appraised article: Long-term risk of cardiovascular events with rosiglitazone: A meta-analysis*. Revista Medica de Chile, 2009. **137**(7): p. 986-989.
61. Dagenais, G.R., et al., *Angiotensin-converting-enzyme inhibitors in stable vascular disease without left ventricular systolic dysfunction or heart failure: a combined analysis of three trials*. Lancet, 2006. **368**(9535): p. 581-8.
62. Dahl, J.S., et al., *Relation of osteoprotegerin in severe aortic valve stenosis to postoperative outcome and left ventricular function*. Am J Cardiol, 2013. **112**(9): p. 1433-8.
63. Dahl, J.S., et al., *Global strain in severe aortic valve stenosis: relation to clinical outcome after aortic valve replacement*. Circ Cardiovasc Imaging, 2012. **5**(5): p. 613-20.
64. Damman, P., et al., *Long-term cardiovascular mortality after procedure-related or spontaneous myocardial infarction in patients with non-ST-segment elevation acute coronary syndrome: a collaborative analysis of individual patient data from the FRISC II, ICTUS, and RITA-3 trials (FIR)*. Circulation, 2012. **125**(4): p. 568-76.
65. DD, D.E.W., et al., *Asymptomatic carotid artery stenosis: who should be screened, who should be treated and how should we treat them?* J Cardiovasc Surg (Torino), 2017. **58**(1): p. 3-12.
66. de Jager, J., et al., *Long-term effects of metformin on endothelial function in type 2 diabetes: A randomized controlled trial*. Journal of Internal Medicine, 2014. **275**(1): p. 59-70.
67. De Servi, S., et al., *Treating acute coronary syndromes with new antiplatelet drugs: the mortality issue with prasugrel and ticagrelor*. Curr Med Res Opin, 2011. **27**(11): p. 2117-22.

68. Detre, K.M. and R. Holubkov, *Coronary revascularization on balance: Robert L. Frye lecture*. Mayo Clin Proc, 2002. **77**(1): p. 72-82.
69. Devereaux, P.J., et al., *How strong is the evidence for the use of perioperative beta blockers in non-cardiac surgery? Systematic review and meta-analysis of randomised controlled trials*. Bmj, 2005. **331**(7512): p. 313-21.
70. Devereaux, P.J., et al., *Rationale, design, and organization of the PeriOperative ISchemic Evaluation (POISE) trial: a randomized controlled trial of metoprolol versus placebo in patients undergoing noncardiac surgery*. Am Heart J, 2006. **152**(2): p. 223-30.
71. Diaz, A., et al., *Long-term prognostic value of resting heart rate in patients with suspected or proven coronary artery disease*. Eur Heart J, 2005. **26**(10): p. 967-74.
72. Domecq, J.P., et al., *Adverse effects of the common treatments for polycystic ovary syndrome: a systematic review and meta-analysis*. J Clin Endocrinol Metab, 2013. **98**(12): p. 4646-54.
73. Du, L., et al., *Cardiovascular safety of sulphonylurea: Comment on the study by Monami et al*. Diabetes, Obesity and Metabolism, 2014. **16**(7): p. 667-669.
74. Duarte, R., *Oral antidiabetic drugs. How to begin and combine without cardiovascular risk*. Revista Portuguesa de Cardiologia, 2013. **32**(SUPPL 1): p. 15-24.
75. Dunn, C.J. and D.H. Peters, *Metformin: A Review of its Pharmacological Properties and Therapeutic Use in Non—Insulin-Dependent Diabetes Mellitus*. Drugs, 1995. **49**(5): p. 721-749.
76. Echouffo-Tcheugui, J.B., et al., *The ADDITION-Cambridge trial protocol: a cluster -- randomised controlled trial of screening for type 2 diabetes and intensive treatment for screen-detected patients*. BMC Public Health, 2009. **9**: p. 136.
77. Eleid, M.F., G.L. Schwartz, and R. Gulati, *Renal denervation for hypertension*. Curr Probl Cardiol, 2014. **39**(2): p. 35-51.
78. Elgendy, I.Y., et al., *Cardiovascular Safety of Dipeptidyl-Peptidase IV Inhibitors: A Meta-Analysis of Placebo-Controlled Randomized Trials*. Am J Cardiovasc Drugs, 2016.
79. Elias, E.G., et al., *Breast cancer prevention trial*. Md Med J, 1994. **43**(3): p. 249-52.
80. Engel, S.S., et al., *Cardiovascular safety of sitagliptin in patients with type 2 diabetes mellitus: A pooled analysis*. Cardiovascular Diabetology, 2013. **12**(1).
81. Erdmann, E., et al., *Observational follow-up of the PROactive study: A 6-year update*. Diabetes, Obesity and Metabolism, 2014. **16**(1): p. 63-74.
82. Erlich, D.R., D.C. Slawson, and A. Shaughnessy, *Diabetes update: screening and diagnosis*. FP Essent, 2013. **408**: p. 11-3.
83. Eshelbrenner, C., et al., *The cardiologist's role in the management of type 2 diabetes-a review*. US Cardiology, 2012. **9**(1): p. 26-29.
84. Fallavollita, J.A., et al., *Prediction of arrhythmic events with positron emission tomography: PAREPET study design and methods*. Contemp Clin Trials, 2006. **27**(4): p. 374-88.
85. Fayad, A., et al., *Perioperative Diastolic Dysfunction in Patients Undergoing Noncardiac Surgery Is an Independent Risk Factor for Cardiovascular Events: A Systematic Review and Meta-analysis*. Anesthesiology, 2016. **125**(1): p. 72-91.
86. Ferlito, S., *[Platelet antiaggregants in the treatment of arterial thrombosis]*. Minerva Cardioangiol, 1991. **39**(10): p. 375-89.
87. Fernando, E., et al., *Cardiovascular Disease in South Asian Migrants*. Canadian Journal of Cardiology, 2015. **31**(9): p. 1139-1150.
88. Ferrannini, E. and R.A. DeFronzo, *Impact of glucose-lowering drugs on cardiovascular disease in type 2 diabetes*. European Heart Journal, 2015. **36**(34): p. 2288-2296.
89. Ferreira, J.P., et al., *Spot urine sodium excretion as prognostic marker in acutely decompensated heart failure: the spironolactone effect*. Clin Res Cardiol, 2016. **105**(6): p. 489-507.
90. Filipiak, K.J., *[Sulphonylurea derivatives and the cardiovascular system]*. Przegł Lek, 2000. **57 Suppl 4**: p. 19-22.
91. Fisher, M., et al., *Cardiovascular safety of albiglutide in the Harmony programme: A meta-analysis*. The Lancet Diabetes and Endocrinology, 2015. **3**(9): p. 697-703.

92. Fisher, S.A., et al., *Stem cell treatment for acute myocardial infarction*. Cochrane Database Syst Rev, 2015(9): p. Cd006536.
93. Foltran, F., et al., *Nutritional profiles in a public health perspective: a critical review*. J Int Med Res, 2010. **38**(2): p. 318-85.
94. Forst, T., et al., *Association of sulphonylurea treatment with all-cause and cardiovascular mortality: a systematic review and meta-analysis of observational studies*. Diab Vasc Dis Res, 2013. **10**(4): p. 302-14.
95. Friedrich, E.B., K.K. Teo, and M. Bohm, *ACE inhibition in secondary prevention: are the results controversial?* Clin Res Cardiol, 2006. **95**(2): p. 61-7.
96. Friedrich, J.O., J. Beyene, and N.K. Adhikari, *Rosiglitazone: can meta-analysis accurately estimate excess cardiovascular risk given the available data? Re-analysis of randomized trials using various methodologic approaches*. BMC Res Notes, 2009. **2**: p. 5.
97. Fu, Y., et al., *Meta-analysis of all-cause and cardiovascular mortality in obstructive sleep apnea with or without continuous positive airway pressure treatment*. Sleep Breath, 2016.
98. Fumagalli, S., et al., *Characteristics, management and prognosis of elderly patients in the Euro Heart Survey on atrial fibrillation*. Aging Clin Exp Res, 2012. **24**(5): p. 517-23.
99. Galan, P., et al., *The scientific basis of the SU.FOL.OM3 study: A secondary intervention trial of folate, B6 and B12 vitamins and/or omega3 fatty acid supplements in the prevention of recurrent ischemic events*. Sang Thrombose Vaisseaux, 2009. **21**(4): p. 207-213.
100. Galan, P., et al., *Background and rationale of the SU.FOL.OM3 study: double-blind randomized placebo-controlled secondary prevention trial to test the impact of supplementation with folate, vitamin B6 and B12 and/or omega-3 fatty acids on the prevention of recurrent ischemic events in subjects with atherosclerosis in the coronary or cerebral arteries*. J Nutr Health Aging, 2003. **7**(6): p. 428-35.
101. Gallwitz, B. and R.G. Bretzel, *How do we continue treatment in patients with type 2 diabetes when therapeutic goals are not reached with oral antidiabetes agents and lifestyle? incretin versus insulin treatment*. Diabetes Care, 2013. **36**(SUPPL.2): p. S180-S189.
102. Ganesan, A.N., et al., *Role of AV nodal ablation in cardiac resynchronization in patients with coexistent atrial fibrillation and heart failure a systematic review*. J Am Coll Cardiol, 2012. **59**(8): p. 719-26.
103. Garber, A., et al., *American association of clinical endocrinologists' comprehensive diabetes management algorithm 2013 consensus statement*. Endocrine Practice, 2013. **19**(SUPPL. 2): p. 1-48.
104. Gasparovic, H., et al., *Impact of remote ischemic preconditioning preceding coronary artery bypass grafting on inducing neuroprotection (RIPCAGE): study protocol for a randomized controlled trial*. Trials, 2014. **15**: p. 414.
105. Gaztañaga, M. and J. Crook, *Androgen deprivation therapy: Minimizing exposure and mitigating side effects*. JNCCN Journal of the National Comprehensive Cancer Network, 2012. **10**(9): p. 1088-1096.
106. George, C.M., et al., *Management of blood glucose with noninsulin therapies in type 2 diabetes*. American Family Physician, 2015. **92**(1): p. 27-34.
107. Gerstein, H.C., et al., *Effects of intensive glycaemic control on ischaemic heart disease: Analysis of data from the randomised, controlled ACCORD trial*. The Lancet, 2014. **384**(9958): p. 1936-1941.
108. Geudelin, B., *Treating Atherosclerotic Disease: A Still-Unsolved Challenge*. Cardiology (Switzerland), 2015. **131**(3): p. 162-164.
109. Ghody, P., et al., *Identifying prediabetes - Is it beneficial in the long run?* Maturitas, 2015. **81**(2): p. 282-286.
110. Ghotbi, A.A., et al., *Association of hypoglycemic treatment regimens with cardiovascular outcomes in overweight and obese subjects with type 2 diabetes: A substudy of the SCOUT trial*. Diabetes Care, 2013. **36**(11): p. 3746-3753.
111. Gillett, M., et al., *Non-pharmacological interventions to reduce the risk of diabetes in people with impaired glucose regulation: a systematic review and economic evaluation*. Health Technol Assess, 2012. **16**(33): p. 1-236, iii-iv.
112. Gitt, A.K., et al., *Should antidiabetic treatment of type 2 diabetes in patients with heart failure differ from that in patients without?* European Journal of Heart Failure, 2012. **14**(12): p. 1389-1400.

113. Godinho, A.S., et al., *On-pump versus off-pump coronary-artery bypass surgery: a meta-analysis*. Arq Bras Cardiol, 2012. **98**(1): p. 87-94.
114. Goyal, A., M.B. Terry, and A.B. Siegel, *Serum antioxidant nutrients, vitamin A, and mortality in U.S. Adults*. Cancer Epidemiol Biomarkers Prev, 2013. **22**(12): p. 2202-11.
115. Graffouillère, L., et al., *Prospective association between the Dietary Inflammatory Index and mortality: Modulation by antioxidant supplementation in the SU.VI.MAX randomized controlled trial*. American Journal of Clinical Nutrition, 2016. **103**(3): p. 878-885.
116. Grenet, G., et al., *Protocol of GLUcose COntrol Safety and Efficacy in type 2 DIabetes, a NETwork meta-analysis: GLUCOSE DINET protocol - Rational and design*. Fundam Clin Pharmacol, 2016.
117. Griffin, S.J., et al., *Effect of early intensive multifactorial therapy on 5-year cardiovascular outcomes in individuals with type 2 diabetes detected by screening (ADDITION-Europe): A cluster-randomised trial*. The Lancet, 2011. **378**(9786): p. 156-167.
118. Grondal, N., et al., *The Viborg Vascular (VIVA) screening trial of 65-74 year old men in the central region of Denmark: study protocol*. Trials, 2010. **11**: p. 67.
119. Guida, B., et al., *Effect of short-term synbiotic treatment on plasma p-cresol levels in patients with chronic renal failure: a randomized clinical trial*. Nutr Metab Cardiovasc Dis, 2014. **24**(9): p. 1043-9.
120. Hajibandeh, S., et al., *Prognostic significance of ankle brachial pressure index: A systematic review and meta-analysis*. Vascular, 2016.
121. Hakim, F.A. and A. Pflueger, *Role of oxidative stress in diabetic kidney disease*. Medical Science Monitor, 2010. **16**(2): p. RA37-48.
122. Hamnvik, O.P.R. and G.T. McMahon, *Glycemic targets for patients with type 2 diabetes mellitus*. Mount Sinai Journal of Medicine, 2009. **76**(3): p. 227-233.
123. Hanefeld, M., E. Duetting, and P. Bramlage, *Cardiac implications of hypoglycaemia in patients with diabetes - a systematic review*. Cardiovascular Diabetology, 2013. **12**(1).
124. Hanif, W. and S. Kumar, *Nateglinide: A new rapid-acting insulinotropic agent*. Expert Opinion on Pharmacotherapy, 2001. **2**(6): p. 1027-1031.
125. Hardy, G., *Saxagliptin demonstrates no increased risk for cardiovascular death, heart attack or stroke in the SAVOR cardiovascular outcomes trial*. Cardiovascular Journal of Africa, 2013. **24**(7): p. 290.
126. Hatrick, A.G., et al., *Does GH replacement therapy in adult GH-deficient patients result in recurrence or increase in size of pituitary tumours?* Eur J Endocrinol, 2002. **146**(6): p. 807-11.
127. Heerspink, H.J., et al., *Sodium Glucose Cotransporter 2 Inhibitors in the Treatment of Diabetes Mellitus: Cardiovascular and Kidney Effects, Potential Mechanisms, and Clinical Applications*. Circulation, 2016. **134**(10): p. 752-72.
128. Heilbrunn, A., *Physical activity and type 2 diabetes mellitus*. Journal of Endocrinology, Metabolism and Diabetes of South Africa, 2012. **17**(1): p. S18-S19.
129. Hemmingsen, B., et al., *Comparison of metformin and insulin versus insulin alone for type 2 diabetes: systematic review of randomised clinical trials with meta-analyses and trial sequential analyses*. Bmj, 2012. **344**: p. e1771.
130. Hemmingsen, B., et al., *Intensive glycaemic control for patients with type 2 diabetes: Systematic review with meta-analysis and trial sequential analysis of randomised clinical trials*. BMJ (Online), 2011. **343**(7834): p. 1136.
131. Hemmingsen, B., et al., *Sulphonylurea monotherapy for patients with type 2 diabetes mellitus*. Cochrane Database Syst Rev, 2013(4): p. Cd009008.
132. Hemmingsen, B., et al., *Sulphonylurea versus metformin monotherapy in patients with type 2 diabetes: a Cochrane systematic review and meta-analysis of randomized clinical trials and trial sequential analysis*. CMAJ Open, 2014. **2**(3): p. E162-75.
133. Hemmingsen, B., et al., *Insulin secretagogues for prevention or delay of type 2 diabetes mellitus and its associated complications in persons at increased risk for the development of type 2 diabetes mellitus*. Cochrane Database Syst Rev, 2016. **10**: p. Cd012151.
134. Hennequin, C., P. Romestaing, and C. Maylin, *[Irradiation of lymph nodes areas in breast cancer]*. Cancer Radiother, 2008. **12**(6-7): p. 559-64.

135. Hermann, T.S., et al., *Quinapril treatment increases insulin-stimulated endothelial function and adiponectin gene expression in patients with type 2 diabetes*. Journal of Clinical Endocrinology and Metabolism, 2006. **91**(3): p. 1001-1008.
136. Hirshberg, B. and A. Katz, *Cardiovascular outcome studies with novel antidiabetes agents: Scientific and operational considerations*. Diabetes Care, 2013. **36**(SUPPL.2): p. S253-S258.
137. Ho, M., et al., *Effect of fat loss on arterial elasticity in obese adolescents with clinical insulin resistance: RESIST study*. Journal of Clinical Endocrinology and Metabolism, 2014. **99**(10): p. E1846-E1853.
138. Holden, S.E. and C.J. Currie, *Mortality risk with sulphonylureas compared to metformin*. Diabetes, Obesity and Metabolism, 2014. **16**(10): p. 885-890.
139. Holman, R.R., *Type 2 diabetes mellitus in 2012: Optimal management of T2DM remains elusive*. Nature Reviews Endocrinology, 2013. **9**(2): p. 67-68.
140. Holman, R.R., H. Sourij, and R.M. Califf, *Cardiovascular outcome trials of glucose-lowering drugs or strategies in type 2 diabetes*. The Lancet, 2014. **383**(9933): p. 2008-2017.
141. Hopper, I., et al., *Prevention of diabetes and reduction in major cardiovascular events in studies of subjects with prediabetes: Meta-analysis of randomised controlled clinical trials*. European Journal of Cardiovascular Prevention and Rehabilitation, 2011. **18**(6): p. 813-823.
142. Huang, J.V., C.R. Greyson, and G.G. Schwartz, *PPAR- $\gamma$  as a therapeutic target in cardiovascular disease: Evidence and uncertainty*. Journal of Lipid Research, 2012. **53**(9): p. 1738-1754.
143. Hueb, W., et al., *A randomized comparative study of patients undergoing myocardial revascularization with or without cardiopulmonary bypass surgery: The MASS III Trial*. Trials, 2008. **9**: p. 52.
144. Iqbal, J., et al., *Effect of eplerenone in percutaneous coronary intervention-treated post-myocardial infarction patients with left ventricular systolic dysfunction: a subanalysis of the EPHEsus trial*. Eur J Heart Fail, 2014. **16**(6): p. 685-91.
145. Janero, D.R., *Synthetic agents in the context of metabolic/bariatric surgery: Expanding the scope and impact of diabetes drug discovery*. Expert Opinion on Drug Discovery, 2014. **9**(3): p. 221-228.
146. Jerie, P., *[New aspects in clinical cardiology: sex-based differences in cardiovascular morbidity and mortality]*. Cas Lek Cesk, 2003. **142**(4): p. 195-6.
147. Jones, K.G., et al., *Interleukin-6 (IL-6) and the prognosis of abdominal aortic aneurysms*. Circulation, 2001. **103**(18): p. 2260-5.
148. Jun, M., et al., *Antioxidants for chronic kidney disease*. Cochrane Database Syst Rev, 2012. **10**: p. Cd008176.
149. Kahlert, P., et al., *No protection of heart, kidneys and brain by remote ischemic preconditioning before transfemoral transcatheter aortic valve implantation: Interim-analysis of a randomized single-blinded, placebo-controlled, single-center trial*. Int J Cardiol, 2017. **231**: p. 248-254.
150. Kakorin, S.V., R.A. Iskandaryan, and A.M. Mkrtumyan, *Glycemia control and glucose-lowering therapy in patients with type 2 diabetes mellitus and cardiovascular disease (review of multicenter randomized trials)*. Diabetes Mellitus, 2016. **19**(3): p. 221-228.
151. Kalayjian, R.C., et al., *Proteinuria is associated with neurocognitive impairment in antiretroviral therapy treated HIV-infected individuals*. J Acquir Immune Defic Syndr, 2014. **67**(1): p. 30-5.
152. Kandzari, D.E., et al., *Catheter-based renal denervation for resistant hypertension: rationale and design of the SYMPPLICITY HTN-3 Trial*. Clin Cardiol, 2012. **35**(9): p. 528-35.
153. Kappel, B.A., N. Marx, and M. Federici, *Oral hypoglycemic agents and the heart failure conundrum: Lessons from and for outcome trials*. Nutrition, Metabolism and Cardiovascular Diseases, 2015. **25**(8): p. 697-705.
154. Karagiannis, T., et al., *Cardiovascular risk with DPP-4 inhibitors: latest evidence and clinical implications*. Therapeutic Advances in Drug Safety, 2015. **7**(2): p. 36-38.
155. Karásek, D., *EMPA-REG OUTCOME and reduction of the risk of heart failure in patients with diabetes*. Interni Medicina pro Praxi, 2016. **18**(4): p. 163-167.
156. Kasai, T., et al., *Propensity analysis of 12 years outcome after bypass graft or balloon angioplasty in patients with multivessel coronary artery disease*. J Cardiol, 2008. **52**(3): p. 186-94.

157. Kezerle, L., L. Shalev, and L. Barski, *Treating the elderly diabetic patient: Special considerations*. Diabetes, Metabolic Syndrome and Obesity: Targets and Therapy, 2014. **7**: p. 391-400.
158. Kiaii, B., et al., *Postoperative atrial fibrillation is not pulmonary vein dependent: results from a randomized trial*. Heart Rhythm, 2015. **12**(4): p. 699-705.
159. King, R.J. and P.J. Grant, *Diabetes and cardiovascular disease: pathophysiology of a life-threatening epidemic*. Herz, 2016. **41**(3): p. 184-192.
160. Kirby, M.G., *Sixty years of diabetes management in primary care*. British Journal of Diabetes and Vascular Disease, 2012. **12**(6): p. 315-320.
161. Kowalewski, M., et al., *Complete revascularisation in ST-elevation myocardial infarction and multivessel disease: meta-analysis of randomised controlled trials*. Heart, 2015. **101**(16): p. 1309-17.
162. Krentz, A.J. and M. Hompesch, *Cardiovascular safety of new drugs for diabetes: Getting the balance right?* Pharmaceutical Medicine, 2014. **28**(3): p. 109-117.
163. Krogsboll, L.T., et al., *General health checks in adults for reducing morbidity and mortality from disease*. Cochrane Database Syst Rev, 2012. **10**: p. Cd009009.
164. Kumarathurai, P., et al., *Effects of Liraglutide on Heart Rate and Heart Rate Variability: A Randomized, Double-Blind, Placebo-Controlled Crossover Study*. Diabetes Care, 2017. **40**(1): p. 117-124.
165. Kvapil, M., *The role of sitagliptin in the treatment of type 2 diabetes based on the results of the TECOS study*. Kardiologicka Revue, 2016. **18**(1): p. 52-54.
166. Kwon, Y., et al., *Body Mass Index-Related Mortality in Patients with Type 2 Diabetes and Heterogeneity in Obesity Paradox Studies: A Dose-Response Meta-Analysis*. PLoS One, 2017. **12**(1): p. e0168247.
167. Lamas Oliveira, C., *Metabolic consequences of craniopharyngioma and their management*. Endocrinologia y Nutricion, 2013. **60**(9): p. 529-534.
168. Lamy, A., et al., *Rationale and design of the coronary artery bypass grafting surgery off or on pump revascularization study: a large international randomized trial in cardiac surgery*. Am Heart J, 2012. **163**(1): p. 1-6.
169. Landray, M.J., V. Toescu, and M.J. Kendall, *The cardioprotective role of  $\beta$ -blockers in patients with diabetes mellitus*. Journal of Clinical Pharmacy and Therapeutics, 2002. **27**(4): p. 233-242.
170. Lee, A.M. and E.L. Chaikof, *Is the abdominal aortic aneurysm rupture rate decreasing?* Adv Surg, 2013. **47**: p. 271-86.
171. Lexchin, J., *Use of surrogate outcomes in medical journal advertising in Canada*. Journal of Population Therapeutics and Clinical Pharmacology, 2013. **20**(2): p. 146-148.
172. Lim, E., et al., *Composite outcomes in cardiovascular research: a survey of randomized trials*. Ann Intern Med, 2008. **149**(9): p. 612-7.
173. Lindholt, J.S., *Relatively high pulmonary and cardiovascular mortality rates in screening-detected aneurysmal patients without previous hospital admissions*. Eur J Vasc Endovasc Surg, 2007. **33**(1): p. 94-9.
174. Lindholt, J.S., *Abdominal aortic aneurysms*. Dan Med Bull, 2010. **57**(12): p. B4219.
175. Lisspers, J., et al., *Long-term effects of lifestyle behavior change in coronary artery disease: effects on recurrent coronary events after percutaneous coronary intervention*. Health Psychol, 2005. **24**(1): p. 41-8.
176. Liu, Y., et al., *Inhalation of diesel exhaust does not exacerbate cardiac hypertrophy or heart failure in two mouse models of cardiac hypertrophy*. Part Fibre Toxicol, 2013. **10**: p. 49.
177. Lobo, R.A., et al., *Prevention of diseases after menopause*. Climacteric, 2014. **17**(5): p. 540-556.
178. Loimaala, A., et al., *Effect of Long-Term Endurance and Strength Training on Metabolic Control and Arterial Elasticity in Patients With Type 2 Diabetes Mellitus*. American Journal of Cardiology, 2009. **103**(7): p. 972-977.
179. Lonardo, A., et al., *Diagnosis and management of cardiovascular risk in nonalcoholic fatty liver disease*. Expert Review of Gastroenterology and Hepatology, 2015. **9**(5): p. 629-650.
180. Losito, A., et al., *Long-term follow-up of atherosclerotic renovascular disease. Beneficial effect of ACE inhibition*. Nephrol Dial Transplant, 2005. **20**(8): p. 1604-9.

181. Lund, S.S. and Y. Gong, *Effects of metformin versus glipizide on cardiovascular outcomes in patients with type 2 diabetes and coronary artery disease*. *Diabetes Care* 2013;36:1304-1311. *Diabetes Care*, 2014. **37**(1): p. e19-e20.
182. Luthra, A. and A. Misra, *Drug approvals in India - Authors' reply*. *The Lancet Diabetes and Endocrinology*, 2016. **4**(1): p. 20-21.
183. Maglione, M.A., et al., *AHRQ Comparative Effectiveness Reviews, in Bariatric Surgery and Nonsurgical Therapy in Adults With Metabolic Conditions and a Body Mass Index of 30.0 to 34.9 kg/m<sup>2</sup>*. 2013, Agency for Healthcare Research and Quality (US): Rockville (MD).
184. Mahaffey, K.W., et al., *Results of a reevaluation of cardiovascular outcomes in the RECORD trial*. *American Heart Journal*, 2013. **166**(2): p. 240-249.e1.
185. Mahmood, K., M. Naeem, and N.A. Rahimnadjad, *Metformin: The hidden chronicles of a magic drug*. *European Journal of Internal Medicine*, 2013. **24**(1): p. 20-26.
186. Mahmoud, A.N., et al., *Does Gender Influence the Cardiovascular Benefits Observed with Sodium Glucose Co-Transporter-2 (SGLT-2) Inhibitors? A Meta-Regression Analysis*. *Cardiol Ther*, 2016.
187. Makkar, R.R., et al., *Determinants and outcomes of acute transcatheter valve-in-valve therapy or embolization: a study of multiple valve implants in the U.S. PARTNER trial (Placement of AoRTic TraNscathetER Valve Trial Edwards SAPIEN Transcatheter Heart Valve)*. *J Am Coll Cardiol*, 2013. **62**(5): p. 418-30.
188. Mann, M.C., et al., *Effect of oral vitamin D analogs on mortality and cardiovascular outcomes among adults with chronic kidney disease: a meta-analysis*. *Clin Kidney J*, 2015. **8**(1): p. 41-8.
189. Mannucci, E., et al., *Cardiac safety profile of rosiglitazone: a comprehensive meta-analysis of randomized clinical trials*. *Int J Cardiol*, 2010. **143**(2): p. 135-40.
190. Mannucci, E., et al., *Pioglitazone and cardiovascular risk. A comprehensive meta-analysis of randomized clinical trials*. *Diabetes Obes Metab*, 2008. **10**(12): p. 1221-38.
191. Marrouche, N.F. and J. Brachmann, *Catheter ablation versus standard conventional treatment in patients with left ventricular dysfunction and atrial fibrillation (CASTLE-AF) - study design*. *Pacing Clin Electrophysiol*, 2009. **32**(8): p. 987-94.
192. Marso, S.P., et al., *The effect of intensive glucose control on all-cause and cardiovascular mortality, myocardial infarction and stroke in persons with type 2 diabetes mellitus: A systematic review and meta-analysis*. *Diabetes and Vascular Disease Research*, 2010. **7**(2): p. 119-130.
193. Maruthur, N.M., et al., *Diabetes medications as monotherapy or metformin-based combination therapy for type 2 diabetes: A systematic review and meta-analysis*. *Annals of Internal Medicine*, 2016. **164**(11): p. 740-751.
194. Mehra, M.R., et al., *Rationale, design, and methods for the Transplant-Eligible Management of Congestive Heart Failure (TMAC) trial: a multicenter clinical outcomes trial using nesiritide for TMAC*. *Am Heart J*, 2007. **153**(6): p. 932-40.
195. Meier, J.J., et al., *Is impairment of ischaemic preconditioning by sulfonylurea drugs clinically important?* *Heart*, 2004. **90**(1): p. 9-12.
196. Meier, M. and M. Hummel, *Cardiovascular disease and intensive glucose control in type 2 diabetes mellitus: Moving practice toward evidence-based strategies*. *Vascular Health and Risk Management*, 2009. **5**: p. 859-871.
197. Mellbin, L.G., et al., *The impact of glucose lowering treatment on long-term prognosis in patients with type 2 diabetes and myocardial infarction: a report from the DIGAMI 2 trial*. *Eur Heart J*, 2008. **29**(2): p. 166-76.
198. Mikkola, A., et al., *Ten-year survival and cardiovascular mortality in patients with advanced prostate cancer primarily treated by intramuscular polyestradiol phosphate or orchiectomy*. *Prostate*, 2007. **67**(4): p. 447-55.
199. Milic, S., et al., *Nonalcoholic steatohepatitis: Emerging targeted therapies to optimize treatment options*. *Drug Design, Development and Therapy*, 2015. **9**: p. 4835-4845.



200. Miller, M.E., et al., *Effects of randomization to intensive glucose control on adverse events, cardiovascular disease, and mortality in older versus younger adults in the ACCORD trial*. *Diabetes Care*, 2014. **37**(3): p. 634-643.
201. Mishra, M., et al., *The effect of atorvastatin on serum lipoproteins in acromegaly*. *Clin Endocrinol (Oxf)*, 2005. **62**(6): p. 650-5.
202. Mizzaci, C.C., et al., *Ivabradine as adjuvant treatment for chronic heart failure*. *Int J Cardiol*, 2017. **227**: p. 43-50.
203. Monami, M., *Metformin may not reduce cardiovascular risk or all-cause mortality*. *Evidence-Based Medicine*, 2013. **18**(2).
204. Monami, M., et al., *Fasting and post-prandial glucose and diabetic complication. A meta-analysis*. *Nutrition, Metabolism and Cardiovascular Diseases*, 2013. **23**(7): p. 591-598.
205. Monami, M., et al., *Dipeptidyl peptidase-4 inhibitors and cardiovascular risk: A meta-analysis of randomized clinical trials*. *Diabetes, Obesity and Metabolism*, 2013. **15**(2): p. 112-120.
206. Monami, M., I. Dicembrini, and E. Mannucci, *Effects of SGLT-2 inhibitors on mortality and cardiovascular events: a comprehensive meta-analysis of randomized controlled trials*. *Acta Diabetol*, 2017. **54**(1): p. 19-36.
207. Monami, M., et al., *Effects of glucagon-like peptide-1 receptor agonists on cardiovascular risk: A meta-analysis of randomized clinical trials*. *Diabetes, Obesity and Metabolism*, 2014. **16**(1): p. 38-47.
208. Monami, M., S. Genovese, and E. Mannucci, *Cardiovascular safety of sulfonylureas: A meta-analysis of randomized clinical trials*. *Diabetes, Obesity and Metabolism*, 2013. **15**(10): p. 938-953.
209. Moody, W.E., et al., *Cardiovascular Effects of Unilateral Nephrectomy in Living Kidney Donors*. *Hypertension*, 2016. **67**(2): p. 368-77.
210. Mookadam, F., et al., *Percutaneous closure of mitral paravalvular leaks: a systematic review and meta-analysis*. *J Heart Valve Dis*, 2012. **21**(2): p. 208-17.
211. Moore, J. and K. Dungan, *Glycemic Variability and Glycemic Control in the Acutely Ill Cardiac Patient*. *Heart Failure Clinics*, 2012. **8**(4): p. 523-538.
212. Morawietz, H., et al., *Endothelial Protection, AT1 blockade and Cholesterol-Dependent Oxidative Stress: the EPAS trial*. *Circulation*, 2006. **114**(1 Suppl): p. I296-301.
213. Moreno-Ulloa, A. and J. Moreno-Ulloa, *Mortality reduction among persons with type 2 diabetes: (-)-Epicatechin as add-on therapy to metformin?* *Medical Hypotheses*, 2016. **91**: p. 86-89.
214. Mostafaie, K., R. Bedenis, and D. Harrington, *Beta-adrenergic blockers for perioperative cardiac risk reduction in people undergoing vascular surgery*. *Cochrane Database Syst Rev*, 2015. **1**: p. Cd006342.
215. Murphy, C.E., *Review of the safety and efficacy of exenatide once weekly for the treatment of type 2 diabetes mellitus*. *Annals of Pharmacotherapy*, 2012. **46**(6): p. 812-821.
216. Nadar, S., H.S. Lim, and G.Y.H. Lip, *Implications of the LIFE trial*. *Expert Opinion on Investigational Drugs*, 2003. **12**(5): p. 871-877.
217. Nasr, H., et al., *Investigating the Effect of a Single Infusion of Reconstituted High-Density Lipoprotein in Patients with Symptomatic Carotid Plaques*. *Ann Vasc Surg*, 2015. **29**(7): p. 1380-91.
218. Nazif, T.M., et al., *Clinical implications of new-onset left bundle branch block after transcatheter aortic valve replacement: analysis of the PARTNER experience*. *Eur Heart J*, 2014. **35**(24): p. 1599-607.
219. Nenna, A., et al., *Basic and clinical research against advanced glycation end products (AGEs): New compounds to tackle cardiovascular disease and diabetic complications*. *Recent Advances in Cardiovascular Drug Discovery*, 2015. **10**(1): p. 10-33.
220. Nguyen, P.L., et al., *Adverse effects of androgen deprivation therapy and strategies to mitigate them*. *Eur Urol*, 2015. **67**(5): p. 825-36.
221. Niiranen, T.J., et al., *Home-measured blood pressure is a stronger predictor of cardiovascular risk than office blood pressure: the Finn-Home study*. *Hypertension*, 2010. **55**(6): p. 1346-51.
222. Nilsson, P.M. and J. Diez, *DPP-4 inhibition and blood pressure lowering in perspective*. *Journal of Hypertension*, 2016. **34**(2): p. 184-187.
223. Nissen, S.E., *Cardiovascular effects of diabetes drugs: Emerging from the dark ages*. *Annals of Internal Medicine*, 2012. **157**(9): p. 671-672.

224. Nissen, S.E. and K. Wolski, *Rosiglitazone revisited: an updated meta-analysis of risk for myocardial infarction and cardiovascular mortality*. Arch Intern Med, 2010. **170**(14): p. 1191-1201.
225. Noordzij, P.G., et al., *Increased preoperative glucose levels are associated with perioperative mortality in patients undergoing noncardiac, nonvascular surgery*. Eur J Endocrinol, 2007. **156**(1): p. 137-42.
226. Ohira, M., et al., *Metformin reduces circulating malondialdehyde-modified low-density lipoprotein in type 2 diabetes mellitus*. Clin Invest Med, 2014. **37**(4): p. E243-51.
227. Ohira, M., et al., *Pioglitazone improves the cardio-ankle vascular index in patients with type 2 diabetes mellitus treated with metformin*. Diabetes, Metabolic Syndrome and Obesity: Targets and Therapy, 2014. **7**: p. 313-319.
228. Olivotto, I., et al., *Surgical myectomy versus alcohol septal ablation for obstructive hypertrophic cardiomyopathy. Will there ever be a randomized trial?* J Am Coll Cardiol, 2007. **50**(9): p. 831-4.
229. Otto, S.J., F.H. Schroder, and H.J. de Koning, *Risk of cardiovascular mortality in prostate cancer patients in the Rotterdam randomized screening trial*. J Clin Oncol, 2006. **24**(25): p. 4184-9.
230. Palmer, S.C., et al., *Comparison of Clinical Outcomes and Adverse Events Associated With Glucose-Lowering Drugs in Patients With Type 2 Diabetes: A Meta-analysis*. Jama, 2016. **316**(3): p. 313-24.
231. Palmer, S.C., et al., *Cinacalcet in patients with chronic kidney disease: a cumulative meta-analysis of randomized controlled trials*. PLoS Med, 2013. **10**(4): p. e1001436.
232. Parolari, A., et al., *Do statins improve outcomes and delay the progression of non-rheumatic calcific aortic stenosis?* Heart, 2011. **97**(7): p. 523-9.
233. Pashkow, F.J., *Rehabilitation in the patient after myocardial infarction with or without surgical management*. Semin Thorac Cardiovasc Surg, 1995. **7**(4): p. 240-7.
234. Pawliszak, W., M. Kowalewski, and L. Anisimowicz, *Off-pump versus on-pump coronary artery bypass grafting: Who benefits?* Journal of Thoracic and Cardiovascular Surgery, 2015. **150**(6): p. 1666-1668.
235. Pereira, A.C., et al., *Dynamic regulation of MTHFR mRNA expression and C677T genotype modulate mortality in coronary artery disease patients after revascularization*. Thromb Res, 2007. **121**(1): p. 25-32.
236. Petrie, M.C., et al., *Ten-Year Outcomes After Coronary Artery Bypass Grafting According to Age in Patients With Heart Failure and Left Ventricular Systolic Dysfunction: An Analysis of the Extended Follow-Up of the STICH Trial (Surgical Treatment for Ischemic Heart Failure)*. Circulation, 2016. **134**(18): p. 1314-1324.
237. Petrovic, I., et al., *Radial artery vs saphenous vein graft used as the second conduit for surgical myocardial revascularization: long-term clinical follow-up*. J Cardiothorac Surg, 2015. **10**: p. 127.
238. Pfutzner, A., M.M. Weber, and T. Forst, *Pioglitazone: update on an oral antidiabetic drug with antiatherosclerotic effects*. Expert Opin Pharmacother, 2007. **8**(12): p. 1985-98.
239. Phung, O.J., et al., *Sulphonylureas and risk of cardiovascular disease: systematic review and meta-analysis*. Diabet Med, 2013. **30**(10): p. 1160-71.
240. Piegas, L.S., et al., *The Organization to Assess Strategies for Ischemic Syndromes (OASIS) registry in patients with unstable angina*. Am J Cardiol, 1999. **84**(5a): p. 7m-12m.
241. Pihlstrom, H., et al., *Symmetric dimethylarginine as predictor of graft loss and all-cause mortality in renal transplant recipients*. Transplantation, 2014. **98**(11): p. 1219-25.
242. Pimentel, A.L., A.C. Bauer, and J.L. Camargo, *Renal posttransplantation diabetes mellitus: An overview*. Clinica Chimica Acta, 2015. **450**: p. 327-332.
243. Pinkerton, J.V., et al., *Risk of first-time heart disease higher for hormone therapy users with metabolic syndrome*. Menopause, 2013. **20**(3): p. 244-247.
244. Pistrosch, F., et al., *In type 2 diabetes, rosiglitazone therapy for insulin resistance ameliorates endothelial dysfunction independent of glucose control*. Diabetes Care, 2004. **27**(2): p. 484-90.
245. Plitt, A. and R.P. Giugliano, *Edoxaban: Review of pharmacology and key phase I to III clinical trials*. J Cardiovasc Pharmacol Ther, 2014. **19**(5): p. 409-16.
246. Pogatsa, G., *Potassium channels in the cardiovascular system*. Diabetes Res Clin Pract, 1995. **28 Suppl**: p. S91-8.

247. Pressl-Wenger, A.R. and F.R. Jornayvaz, *Cardiovascular safety of antidiabetics*. *Revue Medicale Suisse*, 2016. **12**(521): p. 1084-1088.
248. Pugliese, G. and S. Balducci, *Navigator: Physical activity for cardiovascular health?* *The Lancet*, 2014. **383**(9922): p. 1022-1023.
249. Radak, D., et al., *Single center experience on eversion versus standard carotid endarterectomy: a prospective non-randomized study*. *Cardiovasc Surg*, 2000. **8**(6): p. 422-8.
250. Radenković, M., et al., *Therapeutic approach in the improvement of endothelial dysfunction: The current state of the art*. *BioMed Research International*, 2013. **2013**.
251. Radermecker, R.P., et al., *Blood glucose control and cardiovascular disease in patients with type 2 diabetes. Results of ACCORD, ADVANCE and VA-Diabetis trials*. *Revue Medicale de Liege*, 2008. **63**(7-8): p. 511-518.
252. Rehman, M.B., et al., *Efficacy and safety of DPP-4 inhibitors in patients with type 2 diabetes: Meta-analysis of placebo-controlled randomized clinical trials*. *Diabetes Metab*, 2017. **43**(1): p. 48-58.
253. Richter, B., et al., *Pioglitazone for type 2 diabetes mellitus*. *Cochrane Database Syst Rev*, 2006(4): p. Cd006060.
254. Richter, B., et al., *Rosiglitazone for type 2 diabetes mellitus*. *Cochrane Database Syst Rev*, 2007(3): p. Cd006063.
255. Robertson, L., E. Atallah, and G. Stansby, *Pharmacological treatment of vascular risk factors for reducing mortality and cardiovascular events in patients with abdominal aortic aneurysm*. *Cochrane Database Syst Rev*, 2014(1): p. Cd010447.
256. Robless, P., D.P. Mikhailidis, and G.P. Stansby, *Cilostazol for peripheral arterial disease*. *Cochrane Database Syst Rev*, 2007(1): p. Cd003748.
257. Romon, I., et al., *The excess mortality related to cardiovascular diseases and cancer among adults pharmacologically treated for diabetes-the 2001-2006 ENTRED cohort*. *Diabetic Medicine*, 2014. **31**(8): p. 946-953.
258. Rosenstock, J., et al., *Cardiovascular safety of linagliptin in type 2 diabetes: A comprehensive patient-level pooled analysis of prospectively adjudicated cardiovascular events*. *Cardiovascular Diabetology*, 2015. **14**(1).
259. Rossebo, A.B., et al., *Design and baseline characteristics of the simvastatin and ezetimibe in aortic stenosis (SEAS) study*. *Am J Cardiol*, 2007. **99**(7): p. 970-3.
260. Rutqvist, L.E., et al., *Cardiovascular mortality in a randomized trial of adjuvant radiation therapy versus surgery alone in primary breast cancer*. *Int J Radiat Oncol Biol Phys*, 1992. **22**(5): p. 887-96.
261. Rydén, L., et al., *ESC guidelines on diabetes, pre-diabetes, and cardiovascular diseases developed in collaboration with the EASD*. *European Heart Journal*, 2013. **34**(39): p. 3035-3087.
262. Ryder, R.E.J., *Pioglitazone has a dubious bladder cancer risk but an undoubted cardiovascular benefit*. *Diabetic Medicine*, 2015. **32**(3): p. 305-313.
263. Saad, M., et al., *Cardiovascular outcomes with sodium-glucose cotransporter-2 inhibitors in patients with type II diabetes mellitus: A meta-analysis of placebo-controlled randomized trials*. *Int J Cardiol*, 2017. **228**: p. 352-358.
264. Sarafidis, P.A., et al., *Blood pressure reduction in diabetes: lessons from ACCORD, SPRINT and EMPA-REG OUTCOME*. *Nat Rev Endocrinol*, 2017.
265. Sarafidis, P.A. and A. Tsapas, *Empagliflozin, cardiovascular outcomes, and mortality in type 2 diabetes: To the editor*. *New England Journal of Medicine*, 2016. **374**(11): p. 1092.
266. Savarese, G., et al., *Cardiovascular effects of dipeptidyl peptidase-4 inhibitors in diabetic patients: A meta-analysis*. *International Journal of Cardiology*, 2015. **181**: p. 239-244.
267. Scheen, A.J., *SGLT2 inhibition: efficacy and safety in type 2 diabetes treatment*. *Expert Opin Drug Saf*, 2015. **14**(12): p. 1879-904.
268. Scheen, A.J., *[EMPA-REG OUTCOME: Empagliflozin reduces mortality in patients with type 2 diabetes at high cardiovascular risk]*. *Rev Med Liege*, 2015. **70**(11): p. 583-9.
269. Scheen, A.J. and B. Charbonnel, *Effects of glucose-lowering agents on vascular outcomes in type 2 diabetes: A critical reappraisal*. *Diabetes & Metabolism*, 2014. **40**(3): p. 176-185.

270. Schernthaner, G., et al., *Safety and efficacy of the dipeptidyl peptidase-4 inhibitor linagliptin in elderly patients with type 2 diabetes: a comprehensive analysis of data from 1331 individuals aged  $\geq$  65 years*. *Diabetes Obes Metab*, 2014. **16**(11): p. 1078-86.
271. Schernthaner, G. and M.H. Schernthaner-Reiter, *Therapy: Risk of metformin use in patients with T2DM and advanced CKD*. *Nat Rev Endocrinol*, 2015. **11**(12): p. 697-9.
272. Schneider, D. and J. Hsia, *Coronary heart disease prevention in menopausal women*. *Expert Opin Pharmacother*, 2005. **6**(5): p. 695-705.
273. Schrier, R.W., et al., *Appropriate blood pressure control in hypertensive and normotensive type 2 diabetes mellitus: A summary of the ABCD trial*. *Nature Clinical Practice Nephrology*, 2007. **3**(8): p. 428-438.
274. Sekercioglu, N., et al., *Culprit vessel only vs immediate complete revascularization in patients with acute ST-segment elevation myocardial infarction: systematic review and meta-analysis*. *Clin Cardiol*, 2014. **37**(12): p. 765-72.
275. Sharma, A., et al., *Surgical Treatment of Ischemic Mitral Regurgitation: Valve Repair Versus Replacement*. *Curr Cardiol Rep*, 2017. **19**(1): p. 3.
276. Sharma, A., et al., *Role of Vorapaxar After Coronary Revascularization*. *Am J Cardiol*, 2016. **117**(7): p. 1059-64.
277. Sharma, A., et al., *Relationship of body mass index with total mortality, cardiovascular mortality, and myocardial infarction after coronary revascularization: evidence from a meta-analysis*. *Mayo Clin Proc*, 2014. **89**(8): p. 1080-100.
278. Shih, C.J., et al., *Comparative effectiveness of angiotensin-converting-enzyme inhibitors and angiotensin II receptor blockers in patients with type 2 diabetes and retinopathy*. *CMAJ*, 2016. **188**(8): p. E148-E157.
279. Shkolnikova, M., et al., *Biological mechanisms of disease and death in Moscow: rationale and design of the survey on Stress Aging and Health in Russia (SAHR)*. *BMC Public Health*, 2009. **9**: p. 293.
280. Simha, V. and P. Shah, *The surgical cure for diabetes?* *National Medical Journal of India*, 2012. **25**(5): p. 281-283.
281. Singh, A.K., *Deciding oral drugs after metformin in type 2 diabetes: An evidence-based approach*. *Indian J Endocrinol Metab*, 2014. **18**(5): p. 617-23.
282. Singh, A.K., *Polemics of pioglitazone: An appraisal in 2015*. *Expert Review of Endocrinology and Metabolism*, 2015. **10**(4): p. 447-458.
283. Singh, S., Y.K. Loke, and C.D. Furberg, *Long-term risk of cardiovascular events with rosiglitazone: a meta-analysis*. *Jama*, 2007. **298**(10): p. 1189-95.
284. Sinha, B. and S. Ghosal, *Pioglitazone - Do we really need it to manage type 2 diabetes?* *Diabetes and Metabolic Syndrome: Clinical Research and Reviews*, 2013. **7**(4): p. 243-246.
285. Smith, R.J., A.B. Goldfine, and W.R. Hiatt, *Evaluating the cardiovascular safety of new medications for type 2 diabetes: Time to reassess?* *Diabetes Care*, 2016. **39**(5): p. 738-742.
286. Sola, D., et al., *Sulfonylureas and their use in clinical practice*. *Archives of Medical Science*, 2015. **11**(4): p. 840-848.
287. Son, J.W. and S. Kim, *Dipeptidyl peptidase 4 inhibitors and the risk of cardiovascular disease in patients with type 2 diabetes: A tale of three studies*. *Diabetes and Metabolism Journal*, 2015. **39**(5): p. 373-383.
288. Sondergaard, L., et al., *Two-Year Outcomes in Patients With Severe Aortic Valve Stenosis Randomized to Transcatheter Versus Surgical Aortic Valve Replacement: The All-Comers Nordic Aortic Valve Intervention Randomized Clinical Trial*. *Circ Cardiovasc Interv*, 2016. **9**(6).
289. Sourij, H., R. Zweiker, and T.C. Wascher, *Effects of pioglitazone on endothelial function, insulin sensitivity, and glucose control in subjects with coronary artery disease and new-onset type 2 diabetes*. *Diabetes Care*, 2006. **29**(5): p. 1039-45.
290. Špinar, J. and A. Šmahelová, *SAVOR-TIMI 53 - Saxagliptin and cardiovascular outcomes in patients with type 2 diabetes mellitus*. *Vnitřní Lekarství*, 2013. **59**(11): p. 1003-1007.
291. Sportiello, L., et al., *The importance of Pharmacovigilance for the drug safety: Focus on cardiovascular profile of incretin-based therapy*. *International Journal of Cardiology*, 2016. **202**: p. 731-735.

292. Srinivasan, B.T. and M. Davies, *Glycaemic management of type 2 diabetes*. *Medicine (United Kingdom)*, 2014. **42**(12): p. 711-717.
293. Stabile, E., et al., *SAT-TAVI (single antiplatelet therapy for TAVI) study: a pilot randomized study comparing double to single antiplatelet therapy for transcatheter aortic valve implantation*. *Int J Cardiol*, 2014. **174**(3): p. 624-7.
294. Standl, E., M. Müller, and O. Schnell, *The impact of glucose-lowering therapy on cardiovascular outcomes*. *Best Practice and Research: Clinical Endocrinology and Metabolism*, 2009. **23**(3): p. 401-411.
295. Steiner, S., *Empagliflozin, cardiovascular outcomes, and mortality in type 2 diabetes*. *Zeitschrift für Gefäßmedizin*, 2016. **13**(1): p. 17-18.
296. Stone, J.C., et al., *Was there really any evidence that rosiglitazone increased the risk of myocardial infarction or death from cardiovascular causes?* *Pharmacoepidemiology and Drug Safety*, 2015. **24**(3): p. 223-227.
297. Stoner, M.C. and D.J. Defreitas, *Process of care for carotid endarterectomy: perioperative medical management*. *J Vasc Surg*, 2010. **52**(1): p. 223-31.
298. Strojek, K., et al., *Empagliflozin. Results of the EMPA-REG OUTCOME trial. A breakthrough in treatment of type 2 diabetes?* *Diabetologia Kliniczna*, 2016. **5**(3): p. 107-110.
299. Sultan, S. and N. Hynes, *Cardiovascular disease: Primary prevention, disease modulation and regenerative therapy*. *Vascular*, 2012. **20**(5): p. 243-250.
300. Targher, G. and C. Byrne, *Diagnosis and management of nonalcoholic fatty liver disease and its hemostatic/thrombotic and vascular complications*. *Seminars in Thrombosis and Hemostasis*, 2013. **39**(2): p. 214-228.
301. Tarsia, G., et al., *Lower cardiovascular mortality with Medtronic CoreValve versus Edwards SAPIEN in patients with aortic valve stenosis undergoing transcatheter aortic valve implantation*. *Int J Cardiol*, 2014. **177**(2): p. 520-2.
302. Tattersall, M.C., H.M. Johnson, and P.J. Mason, *Contemporary and optimal medical management of peripheral arterial disease*. *Surgical Clinics of North America*, 2013. **93**(4): p. 761-778.
303. Tepel, M., et al., *The antioxidant acetylcysteine reduces cardiovascular events in patients with end-stage renal failure: a randomized, controlled trial*. *Circulation*, 2003. **107**(7): p. 992-5.
304. Tietge, W.J., et al., *Early mitral valve repair versus watchful waiting in patients with severe asymptomatic organic mitral regurgitation; rationale and design of the Dutch AMR trial, a multicenter, randomised trial*. *Neth Heart J*, 2012. **20**(3): p. 94-101.
305. Timsit, J. and D. Dubois-Laforgue, *[Should the occurrence of a first coronary event change the management of diabetes?]*. *Arch Mal Coeur Vaiss*, 2000. **93 Spec No 4**: p. 39-44.
306. Tivesten, Å., et al., *Cardiovascular risk with androgen deprivation therapy for prostate cancer: Potential mechanisms*. *Urologic Oncology: Seminars and Original Investigations*, 2015. **33**(11): p. 464-475.
307. Tkáč, I., *Effect of intensive glycemic control on cardiovascular outcomes and all-cause mortality in type 2 diabetes: Overview and metaanalysis of five trials*. *Diabetes Research and Clinical Practice*, 2009. **86**(SUPPL.1): p. S57-S62.
308. Tousoulis, D., et al., *Diabetes mellitus and heart failure*. *European Cardiology*, 2014. **9**(1): p. 37-42.
309. Trifunovic, Z., et al., *Functional recovery of patients with ischemic cardiomyopathy treated with coronary artery bypass surgery and concomitant intramyocardial bone marrow mononuclear cell implantation--a long-term follow-up study*. *Vojnosanit Pregl*, 2015. **72**(3): p. 225-32.
310. Tsai, W.C., et al., *Chewing areca nut increases the risk of coronary artery disease in Taiwanese men: a case-control study*. *BMC Public Health*, 2012. **12**: p. 162.
311. Tsang, G.M., et al., *Pharmacological reduction of the systemically damaging effects of local ischaemia*. *Eur J Vasc Surg*, 1994. **8**(2): p. 205-8.
312. Tsimihodimos, V., D.P. Mikhailidis, and M. Elisaf, *Summarizing the FIELD study: Lessons from a 'negative' trial*. *Expert Opinion on Pharmacotherapy*, 2013. **14**(18): p. 2601-2610.
313. Unger, T. and M. Stoppelhaar, *Rationale for Double Renin-Angiotensin-Aldosterone System Blockade*. *American Journal of Cardiology*, 2007. **100**(3 SUPPL.): p. S25-S31.

314. van der Horst, I.C.C. and M.W.N. Nijsten, *Metformin in cardiac surgery: High expectations*. The Lancet Diabetes and Endocrinology, 2015. **3**(8): p. 581-582.
315. Vanasse, A., et al., *Stroke and cardiovascular morbidity and mortality associated with rosiglitazone use in elderly diabetic patients*. Diab Vasc Dis Res, 2009. **6**(2): p. 87-93.
316. Vanhees, L., et al., *Importance of characteristics and modalities of physical activity and exercise in the management of cardiovascular health in individuals with cardiovascular risk factors: Recommendations from the EACPR (Part II)*. European Journal of Preventive Cardiology, 2012. **19**(5): p. 1005-1033.
317. Vanholder, R., et al., *Clinical management of the uraemic syndrome in chronic kidney disease*. The Lancet Diabetes and Endocrinology, 2016. **4**(4): p. 360-373.
318. Varenhorst, C., et al., *Causes of mortality with ticagrelor compared with clopidogrel in acute coronary syndromes*. Heart, 2014. **100**(22): p. 1762-9.
319. Varenhorst, C., et al., *Factors contributing to the lower mortality with ticagrelor compared with clopidogrel in patients undergoing coronary artery bypass surgery*. J Am Coll Cardiol, 2012. **60**(17): p. 1623-30.
320. Varvaki Rados, D., et al., *The Association between Sulfonylurea Use and All-Cause and Cardiovascular Mortality: A Meta-Analysis with Trial Sequential Analysis of Randomized Clinical Trials*. PLoS Med, 2016. **13**(4): p. e1001992.
321. Verma, S., et al., *Plasma renin activity predicts cardiovascular mortality in the Heart Outcomes Prevention Evaluation (HOPE) study*. Eur Heart J, 2011. **32**(17): p. 2135-42.
322. Vieira, R.D., et al., *Effect of complete revascularization on 10-year survival of patients with stable multivessel coronary artery disease: MASS II trial*. Circulation, 2012. **126**(11 Suppl 1): p. S158-63.
323. Vonend, O., et al., *[Renal denervation in refractory hypertension: joint statement of the German hypertension league DHL eV and the German societies of cardiology, angiology, nephrology and radiology]*. Dtsch Med Wochenschr, 2015. **140**(5): p. 363.
324. Wade, M.T. and J.P. Rindone, *Myths in the treatment of type 2 diabetes: An alternative viewpoint based on randomized controlled trials*. American Journal of Therapeutics, 2013. **20**(5): p. 543-548.
325. Wang, L.W., et al., *Prognostic value of cardiac tests in potential kidney transplant recipients: a systematic review*. Transplantation, 2015. **99**(4): p. 731-45.
326. Wang, M., et al., *Long-term exposure to elemental constituents of particulate matter and cardiovascular mortality in 19 European cohorts: results from the ESCAPE and TRANSPHORM projects*. Environ Int, 2014. **66**: p. 97-106.
327. Werzowa, J., et al., *Antidiabetic therapy in post kidney transplantation diabetes mellitus*. Transplantation Reviews, 2015. **29**(3): p. 145-153.
328. White, C.M., et al., *Benefits and risks associated with beta-blocker prophylaxis in noncardiac surgery*. Am J Health Syst Pharm, 2010. **67**(7): p. 523-30.
329. White, W.B., et al., *Angiotensin-converting enzyme inhibitor use and major cardiovascular outcomes in type 2 diabetes mellitus treated with the dipeptidyl peptidase 4 inhibitor alogliptin*. Hypertension, 2016. **68**(3): p. 606-613.
330. Wiesbauer, F., et al., *Perioperative beta-blockers for preventing surgery-related mortality and morbidity: a systematic review and meta-analysis*. Anesth Analg, 2007. **104**(1): p. 27-41.
331. Wijeyesundera, D.N., et al., *Perioperative beta blockade in noncardiac surgery: a systematic review for the 2014 ACC/AHA guideline on perioperative cardiovascular evaluation and management of patients undergoing noncardiac surgery: a report of the American College of Cardiology/American Heart Association Task Force on practice guidelines*. J Am Coll Cardiol, 2014. **64**(22): p. 2406-25.
332. Woelk, C.J., *Management of critical limb ischemia*. Canadian Family Physician, 2012. **58**(9): p. 960-963+e491-e494.
333. Wong, C.C., et al., *Influence of gender on cardiovascular mortality in acute myocardial infarction patients with high indication for coronary angiography*. Circulation, 1997. **96**(9 Suppl): p. Ii-51-7.
334. Wong, P.F., et al., *Antiplatelet agents for intermittent claudication*. Cochrane Database Syst Rev, 2011(11): p. Cd001272.

335. Wongcharoenkiat, N., et al., *A comparison of outcomes between percutaneous coronary intervention versus coronary artery bypass surgery in octogenarian patients*. J Med Assoc Thai, 2012. **95 Suppl 2**: p. S154-64.
336. Wu, S., et al., *Dipeptidyl peptidase-4 inhibitors and cardiovascular outcomes: Meta-analysis of randomized clinical trials with 55,141 participants*. Cardiovascular Therapeutics, 2014. **32**(4): p. 147-158.
337. Yanagawa, B., et al., *A systematic review and meta-analysis of in situ versus composite bilateral internal thoracic artery grafting*. J Thorac Cardiovasc Surg, 2016.
338. Yee, M.S., et al., *Treatment The effects of rosiglitazone on atherosclerotic progression in patients with Type 2 diabetes at high cardiovascular risk*. Diabetic Medicine, 2010. **27**(12): p. 1392-1400.
339. Yokoyama, H., et al., *Migliitol increases the adiponectin level and decreases urinary albumin excretion in patients with type 2 diabetes mellitus*. Metabolism, 2007. **56**(11): p. 1458-63.
340. Yoshii, H., et al., *Effects of pioglitazone on macrovascular events in patients with type 2 diabetes mellitus at high risk of stroke: The profit-J study*. Journal of Atherosclerosis and Thrombosis, 2014. **21**(6): p. 563-573.
341. Yusuf, S., et al., *Effects of candesartan on the development of a new diagnosis of diabetes mellitus in patients with heart failure*. Circulation, 2005. **112**(1): p. 48-53.
342. Zaugg, M., et al., *Adrenergic receptor genotype but not perioperative bisoprolol therapy may determine cardiovascular outcome in at-risk patients undergoing surgery with spinal block: the Swiss Beta Blocker in Spinal Anesthesia (BBSA) study: a double-blinded, placebo-controlled, multicenter trial with 1-year follow-up*. Anesthesiology, 2007. **107**(1): p. 33-44.
343. Zhang, Y., et al., *Lipid profiling reveals different therapeutic effects of metformin and glipizide in patients with type 2 diabetes and coronary artery disease*. Diabetes Care, 2014. **37**(10): p. 2804-2812.
344. Zhao, F., et al., *The influence of mortality rate from membrane flux for end-stage renal disease: A meta-analysis*. Nephrol Ther, 2017. **13**(1): p. 9-13.
345. Zinman, B., et al., *Rationale, design, and baseline characteristics of a randomized, placebo-controlled cardiovascular outcome trial of empagliflozin (EMPA-REG OUTCOME)*. Cardiovasc Diabetol, 2014. **13**: p. 102.
346. Zuccala, A., et al., *3 R study: renal outcome in renal ischemia: revascularisation or medical treatment*. J Nephrol, 2000. **13**(2): p. 106-9.
